# Supplementary material
Source: publisher site journal article supplement (https://www.dovepress.com/get_supplementary_file.php?f=260150.xlsx)
Supplement: Supplementary file 1 [file get_supplementary_file.php]

## Sheet: Table S1 DEmRNAs_TCGA
Table S1 Differentially expressed mRNAs of TNBC samples in the TCGA database
gene	baseMean	lfcSE	stat	log2FoldChange	pvalue	padj	change
STMN1	14772.8	0.369176	8.41472	3.10652	3.93839e-17	5.0123e-15	UP
CDCA8	1787.01	0.472103	9.81967	4.63667	9.26507e-23	2.8255e-20	UP
KIF2C	1759.76	0.501546	9.92274	4.9779	3.31535e-23	1.06111e-20	UP
LRP8	797.249	0.333413	7.36014	2.4541	1.8372e-13	1.31977e-11	UP
DEPDC1	638.268	0.44078	10.3633	4.57048	3.6426e-25	1.47189e-22	UP
AK5	1891.37	0.646653	-5.63256	-3.64187	1.7755e-08	4.47001e-07	DOWN
GBP1	7881.52	0.458337	4.71471	2.16091	2.42058e-06	3.39028e-05	UP
GBP5	2144.82	0.633898	5.51717	3.4969	3.4451e-08	8.05834e-07	UP
CDC7	923.631	0.574288	4.99098	2.86632	6.00742e-07	1.01673e-05	UP
COL11A1	3608.19	0.546194	10.9083	5.95963	1.05161e-27	6.79885e-25	UP
GPSM2	1896.61	0.499624	5.23273	2.61442	1.67029e-07	3.30035e-06	UP
GSTM3	4201.03	0.475531	-4.62369	-2.19871	3.76976e-06	4.98411e-05	DOWN
HMGCS2	1747.48	1.11316	-3.30731	-3.59785	0.000941974	0.00553641	DOWN
ANP32E	7704.01	0.274589	8.60092	2.36173	7.90819e-18	1.12617e-15	UP
HORMAD1	1197.59	0.768452	8.79122	6.75593	1.47949e-18	2.42771e-16	UP
S100A9	7626.39	0.801648	4.16675	3.33724	3.08973e-05	0.000308435	UP
S100A8	2751.74	0.806693	4.34092	3.49824	1.41887e-05	0.000156594	UP
CKS1B	3094.62	0.428298	5.83008	2.49703	5.5401e-09	1.57096e-07	UP
MEX3A	3622.77	0.43499	8.2358	3.58258	1.78359e-16	2.089e-14	UP
ATP1A2	1892.45	0.509139	-14.437	-7.36888	3.02571e-47	4.89046e-43	DOWN
NUF2	1112.89	0.439098	12.1034	5.3182	1.01297e-33	1.72344e-30	UP
ASPM	1434	0.416102	11.9302	4.966	8.2375e-33	1.14427e-29	UP
KIF14	516.829	0.368784	12.8208	4.73227	1.25329e-37	3.37616e-34	UP
UBE2T	973.668	0.290516	13.6708	3.97254	1.51631e-42	1.36178e-38	UP
FMOD	11040.3	0.497148	-6.16096	-3.06285	7.23037e-10	2.51863e-08	DOWN
PIGR	10892.6	0.908915	-4.95709	-4.48477	7.15558e-07	1.18865e-05	DOWN
NEK2	1211.7	0.443414	13.0915	5.81052	3.6835e-39	1.70104e-35	UP
DTL	914.204	0.397683	9.29668	3.69788	1.44894e-20	3.14351e-18	UP
CENPF	5839.93	0.361084	12.7328	4.59791	3.885e-37	8.97047e-34	UP
CAPN8	488.419	0.747973	-3.86184	-2.88747	0.000112537	0.000927795	DOWN
EXO1	788.939	0.4775	10.5998	5.06522	2.98773e-26	1.46335e-23	UP
KIF26B	1112.78	0.497721	6.1761	3.07412	6.57033e-10	2.30861e-08	UP
SOX11	858.776	0.725902	5.85349	4.24815	4.81353e-09	1.38313e-07	UP
RRM2	2426.14	0.472448	10.6657	5.04001	1.47363e-26	7.68331e-24	UP
ATP6V1C2	1118.86	0.589364	4.71945	2.78139	2.36478e-06	3.32653e-05	UP
SDC1	18392.3	0.517267	5.04477	2.60943	4.54067e-07	7.95565e-06	UP
MTHFD2	7692.03	0.435271	6.05575	2.63588	1.39768e-09	4.56379e-08	UP
AFF3	1911.39	0.534179	-8.05251	-4.30179	8.11127e-16	8.82844e-14	DOWN
BUB1	1706.06	0.501725	10.0832	5.06053	6.5526e-24	2.32768e-21	UP
EN1	2792.15	0.414948	9.40466	3.90259	5.21985e-21	1.23153e-18	UP
NOSTRIN	1194.24	0.437931	-6.13447	-2.12652	8.5445e-10	2.94467e-08	DOWN
SPC25	297.756	0.390588	7.5717	2.95808	3.68366e-14	2.99191e-12	UP
CDCA7	831.919	0.461222	7.07984	3.2658	1.44316e-12	8.67132e-11	UP
ERBB4	1249.44	0.734614	-5.99568	-4.40225	2.02637e-09	6.27438e-08	DOWN
FN1	137280	0.652947	3.44663	2.25025	0.000567631	0.00362849	UP
HJURP	1018.75	0.406662	13.3308	5.42561	1.53215e-40	8.25471e-37	UP
MLPH	3410.94	0.69802	-5.53065	-3.859	3.19039e-08	7.52791e-07	DOWN
ITPR1	4239.53	0.366496	-8.38815	-3.07429	4.9387e-17	6.16403e-15	DOWN
OXTR	3252.03	0.655892	-6.92994	-4.54417	4.21016e-12	2.31853e-10	DOWN
RBMS3	2006.48	0.514942	-5.00195	-2.57573	5.67536e-07	9.66096e-06	DOWN
CX3CR1	671.053	0.527182	-4.65903	-2.4563	3.17709e-06	4.30438e-05	DOWN
KIF15	732.445	0.464004	8.50962	3.94965	1.745e-17	2.39021e-15	UP
TMEM158	1581.84	0.513611	7.32969	3.76488	2.3069e-13	1.62823e-11	UP
SEMA3G	4345.35	0.483791	-7.84909	-3.79729	4.19051e-15	4.05577e-13	DOWN
PRICKLE2	1817.23	0.505601	-4.08048	-2.06308	4.49421e-05	0.000425292	DOWN
PHLDB2	3406.25	0.495882	-6.00858	-2.97954	1.87156e-09	5.87951e-08	DOWN
POLQ	401.431	0.399746	9.47788	3.79058	2.59495e-21	6.35487e-19	UP
MCM2	2949.64	0.37974	6.7534	2.56457	1.44418e-11	7.13833e-10	UP
CLSTN2	3996.05	0.596228	-6.70956	-4.00003	1.95208e-11	9.35115e-10	DOWN
ZIC1	557.639	0.47476	8.31334	3.94813	9.30475e-17	1.12233e-14	UP
AGTR1	687.743	0.478362	-10.8035	-5.17355	3.31379e-27	1.98373e-24	DOWN
PLCH1	1173.33	0.51409	4.50972	2.31846	6.49135e-06	7.96052e-05	UP
SMC4	3929.38	0.419031	6.12613	2.56706	9.00418e-10	3.07035e-08	UP
TRIM59	696.4	0.39816	7.016	2.79375	2.28317e-12	1.33464e-10	UP
ECT2	2669.42	0.432292	5.93812	2.56704	2.88301e-09	8.71806e-08	UP
LAMP3	1124.4	0.576703	4.8885	2.81926	1.01609e-06	1.60931e-05	UP
ECE2	1118.68	0.390152	8.39066	3.27389	4.83426e-17	6.05706e-15	UP
RPL39L	985.89	0.400285	5.70735	2.28464	1.1475e-08	3.01089e-07	UP
TPRG1	671.534	0.487357	-6.30765	-3.07442	2.83297e-10	1.06735e-08	DOWN
TP63	1833.19	0.725579	-4.22824	-3.067	2.35528e-05	0.000243949	DOWN
TACC3	2303.89	0.441624	7.06116	3.11845	1.65119e-12	9.8845e-11	UP
S100P	2378.98	0.682602	9.14951	6.24383	5.71919e-20	1.12048e-17	UP
NCAPG	1087.9	0.455967	10.0155	4.56832	1.30284e-23	4.43321e-21	UP
UCHL1	2390.16	0.635483	3.68961	2.34451	0.000224602	0.00167138	UP
NMU	124.801	0.670531	6.9327	4.66015	4.12889e-12	2.28155e-10	UP
ALB	509.865	0.763601	-5.82346	-8.44359	5.7643e-09	1.62456e-07	DOWN
CXCL2	1243.31	0.487616	-10.6961	-5.21856	1.06185e-26	5.62711e-24	DOWN
CXCL9	6381.76	0.600956	6.56564	3.94514	5.18094e-11	2.2831e-09	UP
ART3	1988.98	0.804918	5.78046	4.64464	7.44947e-09	2.04598e-07	UP
CXCL10	4015.99	0.614891	7.48452	4.60147	7.1807e-14	5.48755e-12	UP
CXCL11	814.681	0.622106	6.79903	4.23028	1.05329e-11	5.34515e-10	UP
SPP1	15346.2	0.579075	6.21259	3.5972	5.21198e-10	1.86358e-08	UP
H2AFZ	9233.23	0.316716	6.36724	2.01661	1.92456e-10	7.55017e-09	UP
CENPE	1274.67	0.435838	8.80065	3.83617	1.36021e-18	2.25488e-16	UP
UGT8	1818.88	0.520085	4.79317	2.49286	1.64169e-06	2.42658e-05	UP
SYNPO2	8270.73	0.471705	-9.76098	-4.6043	1.65555e-22	4.86522e-20	DOWN
MAD2L1	1202.07	0.347369	8.92454	3.10037	4.4754e-19	8.17354e-17	UP
CCNA2	1456.86	0.416945	10.5355	4.39366	5.92788e-26	2.69894e-23	UP
PLK4	629.598	0.392594	7.2296	2.83864	4.84401e-13	3.25385e-11	UP
INPP4B	1935.25	0.404051	-7.96854	-3.21984	1.60556e-15	1.68511e-13	DOWN
MND1	292.344	0.469597	9.23739	4.34256	2.52572e-20	5.37147e-18	UP
CPE	7373.77	0.491306	-4.91302	-2.41377	8.96862e-07	1.4467e-05	DOWN
TRIP13	1432.29	0.445932	9.23173	4.11744	2.66285e-20	5.5256e-18	UP
LIFR	4735.84	0.453077	-8.84721	-4.00857	8.97382e-19	1.54302e-16	DOWN
IL6ST	17571.9	0.358684	-6.77355	-2.42956	1.2566e-11	6.26865e-10	DOWN
DEPDC1B	382.293	0.432153	10.393	4.49606	2.66872e-25	1.12038e-22	UP
CENPK	200.298	0.392404	6.66703	2.61712	2.61023e-11	1.22643e-09	UP
CCNB1	2202.89	0.317104	10.4366	3.30967	1.68696e-25	7.271e-23	UP
CMYA5	1542.77	0.560185	-4.36557	-2.44553	1.2679e-05	0.000142363	DOWN
CDO1	1633.68	0.551698	-9.1701	-5.05999	4.72597e-20	9.37249e-18	DOWN
LMNB1	2629.07	0.421844	8.35634	3.52523	6.46933e-17	7.95162e-15	UP
CXCL14	13110.1	0.615214	-3.47731	-2.13917	0.000506477	0.00330022	DOWN
KIF20A	1400.46	0.428635	11.7373	5.03319	8.20348e-32	8.83952e-29	UP
FGF1	1484.6	0.436049	-5.23714	-2.28368	1.63086e-07	3.23233e-06	DOWN
PTTG1	1169.17	0.40477	10.6432	4.3092	1.87666e-26	9.62934e-24	UP
HMMR	574.304	0.398098	10.7743	4.29157	4.55031e-27	2.62003e-24	UP
SCGB3A1	745.67	0.938903	-2.72361	-2.55248	0.00645719	0.0264249	DOWN
BTNL9	3320.49	0.605957	-7.18333	-4.35233	6.80354e-13	4.42517e-11	DOWN
E2F3	2192.13	0.300992	6.96547	2.09658	3.27307e-12	1.84651e-10	UP
HIST1H2BE	5.87101	0.720426	3.78893	2.76365	0.000151295	0.00119754	UP
HIST1H2BH	41.3354	0.578683	4.63457	2.68454	3.57686e-06	4.74848e-05	UP
HIST1H2BK	1526.56	0.426519	5.82566	2.48481	5.6889e-09	1.60611e-07	UP
TCF19	2433.39	0.48952	5.24774	2.56888	1.53973e-07	3.07432e-06	UP
TAP1	10317	0.481211	5.1875	2.49625	2.1314e-07	4.07208e-06	UP
KIFC1	2768.22	0.510084	8.60767	4.39089	7.45627e-18	1.06651e-15	UP
DST	25083.5	0.426004	-5.39813	-2.29962	6.73384e-08	1.48484e-06	DOWN
SH3BGRL2	2084.09	0.461406	-5.11113	-2.35835	3.20243e-07	5.84208e-06	DOWN
TTK	1067.23	0.369372	11.8166	4.36608	3.20461e-32	3.69973e-29	UP
RSPO3	700.109	0.497181	-5.31126	-2.64082	1.08867e-07	2.25447e-06	DOWN
SAMD5	857.304	0.653485	-4.36795	-2.85423	1.25415e-05	0.000141015	DOWN
ESR1	4376	0.509759	-9.36257	-4.77285	7.78171e-21	1.77149e-18	DOWN
AGR2	2575.64	0.735621	-6.35504	-4.6714	2.08374e-10	8.07661e-09	DOWN
AGR3	617.251	0.820746	-7.03558	-5.76872	1.98434e-12	1.18132e-10	DOWN
HOXA5	599.712	0.545378	-3.73892	-2.03924	0.000184813	0.00141772	DOWN
ANLN	3759.1	0.488778	10.8058	5.28226	3.22991e-27	1.97e-24	UP
CD36	48272	0.630376	-8.89505	-5.60469	5.83927e-19	1.04867e-16	DOWN
SEMA3C	7068.39	0.514589	-6.27963	-3.23136	3.39371e-10	1.26388e-08	DOWN
STEAP4	4032.62	0.544045	-5.03098	-2.737	4.87991e-07	8.44476e-06	DOWN
PDK4	15209.2	0.6652	-6.91618	-4.59866	4.63979e-12	2.52501e-10	DOWN
SLC26A3	84.108	0.768795	-7.81287	-6.19347	5.58994e-15	5.25068e-13	DOWN
PTN	3667.76	0.601211	-7.42157	-4.46146	1.15742e-13	8.54215e-12	DOWN
EZH2	1398.25	0.323894	10.7098	3.46916	9.15823e-27	4.93415e-24	UP
RAI2	1362.01	0.347656	-9.71451	-3.37757	2.615e-22	7.54753e-20	DOWN
SRPX	2551.87	0.494076	-4.86794	-2.40514	1.12769e-06	1.75595e-05	DOWN
MAOA	6247.69	0.751456	-5.03749	-3.78278	4.71679e-07	8.19758e-06	DOWN
AR	4266.13	0.585614	-5.57331	-3.26359	2.49944e-08	6.06991e-07	DOWN
ITM2A	3082.57	0.428926	-7.43215	-3.18789	1.06847e-13	7.90372e-12	DOWN
CENPI	335.556	0.475122	6.73398	3.20038	1.65088e-11	8.01296e-10	UP
GPRASP1	788.363	0.325906	-9.35619	-3.04963	8.26633e-21	1.84288e-18	DOWN
TCEAL7	199.031	0.350124	-10.1833	-3.56808	2.35482e-24	8.65021e-22	DOWN
COL4A6	454.732	0.514863	-8.00264	-4.12271	1.21779e-15	1.29495e-13	DOWN
VGLL1	3863.15	0.633073	6.78754	4.29618	1.1406e-11	5.73421e-10	UP
HMGB3	3128.5	0.288467	10.5587	3.04592	4.62999e-26	2.20102e-23	UP
ADAMDEC1	498.361	0.849382	3.41165	2.89519	0.000645715	0.00404445	UP
CDCA2	1259.04	0.493047	11.2854	5.56868	1.54886e-29	1.19211e-26	UP
PBK	729.693	0.437426	11.8669	5.19628	1.75931e-32	2.10635e-29	UP
IDO1	1228.2	0.606531	4.8308	2.92994	1.35988e-06	2.06673e-05	UP
PLAT	4390.79	0.444361	-5.18965	-2.30608	2.1069e-07	4.03481e-06	DOWN
MCM4	7567.9	0.410695	6.85717	2.81621	7.02395e-12	3.68001e-10	UP
GGH	1952.23	0.275113	9.69903	2.6684	3.04374e-22	8.70725e-20	UP
MYBL1	1984.87	0.549016	7.1763	3.94002	7.16215e-13	4.64907e-11	UP
RDH10	7121.85	0.616324	4.07345	2.51038	4.63214e-05	0.000436047	UP
PI15	4515.53	0.699987	-3.94999	-2.76435	7.81539e-05	0.000681427	DOWN
RUNX1T1	700.394	0.38889	-7.61883	-2.96317	2.55993e-14	2.155e-12	DOWN
RAD54B	248.911	0.265056	8.85993	2.34882	8.0062e-19	1.384e-16	UP
CCNE2	305.782	0.448858	6.32265	2.83863	2.57118e-10	9.77836e-09	UP
MATN2	4623.87	0.415494	-8.3181	-3.45622	8.93829e-17	1.08217e-14	DOWN
CTHRC1	2756.52	0.468067	4.50813	2.11011	6.54006e-06	8.01418e-05	UP
DSCC1	648.1	0.387367	6.3744	2.46942	1.83683e-10	7.24115e-09	UP
COL14A1	8352.88	0.525316	-6.59668	-3.46521	4.20457e-11	1.88773e-09	DOWN
ATAD2	4567.69	0.432387	7.03302	3.04101	2.02113e-12	1.20101e-10	UP
SQLE	4730.29	0.34814	9.58769	3.33793	9.00804e-22	2.42662e-19	UP
CDKN2A	1676.28	0.669345	5.55406	3.71678	2.79104e-08	6.68814e-07	UP
MELK	1747.96	0.570857	10.2202	5.83729	1.6093e-24	6.12026e-22	UP
MAMDC2	1278.2	0.579181	-4.36319	-2.52711	1.28179e-05	0.000143623	DOWN
PSAT1	3215.54	0.463973	6.98767	3.24213	2.79494e-12	1.59346e-10	UP
NTRK2	11536.3	0.734834	-3.4266	-2.5173	0.000611184	0.00386335	DOWN
CKS2	1981.06	0.38818	9.49757	3.68707	2.14836e-21	5.34214e-19	UP
ZNF367	643.107	0.475032	6.243	2.96596	4.29244e-10	1.55732e-08	UP
HBB	10631.7	0.72098	-8.29659	-5.97452	1.07143e-16	1.28755e-14	DOWN
SCUBE2	4239.44	0.391511	-13.0286	-5.10161	8.41831e-39	3.02367e-35	DOWN
DKK3	4046.5	0.419871	-5.42592	-2.2782	5.76553e-08	1.2907e-06	DOWN
E2F8	298.123	0.416409	11.9194	4.97385	9.38061e-33	1.21295e-29	UP
FEN1	1735.28	0.38988	5.55227	2.16475	2.81989e-08	6.74729e-07	UP
CDCA5	1760.3	0.466134	9.91726	4.6236	3.50229e-23	1.10995e-20	UP
DHCR7	8695.45	0.46574	6.1776	2.87712	6.50826e-10	2.29178e-08	UP
PDE2A	1997.45	0.412649	-10.3713	-4.28021	3.35047e-25	1.37098e-22	DOWN
PGR	1402.84	0.656391	-5.15868	-3.58883	2.48699e-07	4.66867e-06	DOWN
MMP1	3168.05	0.824013	8.50229	6.98175	1.85894e-17	2.51431e-15	UP
MMP3	777.756	0.735505	2.85979	2.10307	0.00423927	0.0188395	UP
MMP12	447.177	0.704286	3.89273	2.74139	9.9124e-05	0.000833797	UP
SCN4B	1211.24	0.43239	-8.78263	-3.79805	1.59701e-18	2.60731e-16	DOWN
H2AFX	1719.84	0.371229	5.99675	2.2262	2.01311e-09	6.23929e-08	UP
CHEK1	1008.08	0.286117	8.71173	2.49269	2.9927e-18	4.60677e-16	UP
ITIH5	9539.56	0.513061	-9.50633	-4.87714	1.97498e-21	4.98776e-19	DOWN
MCM10	1039.29	0.511905	9.79301	5.01555	1.20645e-22	3.61107e-20	UP
ANKRD30A	692.586	0.73683	-9.7482	-7.22004	1.87773e-22	5.46842e-20	DOWN
CXCL12	14081.2	0.446697	-5.71349	-2.55218	1.10682e-08	2.91598e-07	DOWN
ZWINT	1249.93	0.375578	8.23312	3.09241	1.82393e-16	2.12854e-14	UP
KIF11	1906.44	0.39543	9.51957	3.76466	1.73896e-21	4.42627e-19	UP
CEP55	1665.29	0.506103	10.5416	5.33736	5.55506e-26	2.56532e-23	UP
HELLS	580.274	0.373222	5.44811	2.03347	5.09069e-08	1.15644e-06	UP
ACADSB	2968.38	0.357475	-6.92484	-2.47549	4.36481e-12	2.38339e-10	DOWN
MKI67	5476.84	0.54187	9.36269	5.07329	7.77292e-21	1.77149e-18	UP
RAD51AP1	615.372	0.374603	9.19021	3.44352	3.92071e-20	7.9213e-18	UP
CLEC7A	982.127	0.516242	4.7619	2.45838	1.91783e-06	2.78633e-05	UP
RERGL	366.795	0.705431	-5.3838	-3.79802	7.29303e-08	1.59401e-06	DOWN
PTHLH	463.107	0.576941	-3.99663	-2.30591	6.42494e-05	0.000577566	DOWN
TMTC1	3878.15	0.5087	-7.30989	-3.71856	2.6737e-13	1.86674e-11	DOWN
AMIGO2	2880.02	0.3976	-8.0317	-3.1935	9.61308e-16	1.03584e-13	DOWN
TROAP	664.155	0.470725	9.85303	4.64055	6.65075e-23	2.06723e-20	UP
RACGAP1	2447.72	0.407216	6.86411	2.79524	6.6906e-12	3.53399e-10	UP
MUCL1	27823.4	1.06564	-4.36605	-4.5468	1.26513e-05	0.000142101	DOWN
NAV3	505.306	0.495552	-4.57692	-2.26829	4.71873e-06	6.03562e-05	DOWN
LIN7A	482.907	0.403616	-9.17063	-3.70279	4.70244e-20	9.37249e-18	DOWN
SOCS2	1719.01	0.348754	-8.57962	-2.99232	9.51899e-18	1.33787e-15	DOWN
NTN4	6875.66	0.494414	-6.07514	-3.0036	1.2388e-09	4.09461e-08	DOWN
IGF1	596.114	0.607659	-6.4024	-3.89097	1.52953e-10	6.12685e-09	DOWN
RNFT2	428.846	0.42573	6.45681	2.74917	1.06933e-10	4.36453e-09	UP
TESC	218.438	0.482722	-6.80566	-3.28685	1.00588e-11	5.12869e-10	DOWN
GJB2	682.661	0.590242	6.07427	3.5859	1.24553e-09	4.11266e-08	UP
DCLK1	1730.79	0.435541	-8.53761	-3.71882	1.37026e-17	1.90107e-15	DOWN
CKAP2	2036.34	0.359548	5.93185	2.13282	2.99535e-09	9.01562e-08	UP
DIAPH3	1170.86	0.54463	7.72004	4.20525	1.16294e-14	1.03562e-12	UP
DACH1	595.888	0.456394	-9.84191	-4.49455	7.42858e-23	2.28701e-20	DOWN
EDNRB	1511.55	0.471867	-4.64273	-2.19079	3.43838e-06	4.59294e-05	DOWN
GZMB	322.144	0.603322	4.32617	2.61025	1.51726e-05	0.000165923	UP
CDKN3	495.096	0.414337	9.47124	3.92603	2.76532e-21	6.72119e-19	UP
DLGAP5	866.308	0.429874	11.3771	4.89384	5.43787e-30	4.62591e-27	UP
NDN	1698.56	0.473572	-6.16633	-2.92023	6.98932e-10	2.44785e-08	DOWN
BUB1B	1025.72	0.432649	10.1291	4.38373	4.10555e-24	1.47462e-21	UP
RAD51	654.326	0.435985	9.42857	4.1123	4.15731e-21	1.0029e-18	UP
OIP5	167.176	0.392336	9.4223	3.70073	4.41315e-21	1.05674e-18	UP
NUSAP1	2258.51	0.418842	10.9555	4.58941	6.25271e-28	4.125e-25	UP
SEMA6D	930.351	0.612708	-3.36964	-2.06461	0.000752656	0.0045941	DOWN
CCNB2	1590.08	0.397607	11.5879	4.60856	4.7473e-31	4.51357e-28	UP
CA12	3349.33	0.588574	-4.19632	-2.46975	2.71291e-05	0.000275779	DOWN
THSD4	2445.77	0.494703	-5.24208	-2.59328	1.58774e-07	3.15847e-06	DOWN
BCL2A1	358.266	0.545033	4.43421	2.41704	9.24103e-06	0.000108038	UP
FANCI	2181.47	0.331795	8.11491	2.69256	4.86142e-16	5.38186e-14	UP
BLM	654.486	0.35327	8.86983	3.13391	7.32562e-19	1.29403e-16	UP
PRC1	3730.83	0.38385	10.8108	4.14995	3.06009e-27	1.90232e-24	UP
PKMYT1	842.198	0.505915	10.5943	5.36466	3.16699e-26	1.528e-23	UP
PAQR4	1111.56	0.302455	9.66195	2.9225	4.37463e-22	1.21909e-19	UP
IL32	4089.66	0.508774	4.865	2.47516	1.14455e-06	1.77708e-05	UP
MYH11	14176.6	0.511507	-9.35046	-6.11943	8.72665e-21	1.91903e-18	DOWN
PLK1	2146.69	0.443782	11.611	5.1542	3.62321e-31	3.54921e-28	UP
SHCBP1	726.245	0.434443	9.50536	4.13109	1.99364e-21	4.99584e-19	UP
TAT	4111.8	0.867755	-7.34115	-6.33325	2.11764e-13	1.5012e-11	DOWN
CENPN	840.87	0.347328	7.8309	2.7201	4.84374e-15	4.59175e-13	UP
COTL1	11861.2	0.51037	4.36031	2.22533	1.2988e-05	0.000145295	UP
GINS2	716.905	0.415302	6.79776	2.82342	1.06259e-11	5.37548e-10	UP
SLC7A5	13784.6	0.431774	10.6252	4.58772	2.27423e-26	1.1487e-23	UP
FANCA	976.174	0.422136	8.80837	3.71897	1.26979e-18	2.1268e-16	UP
SPAG5	1258.15	0.414237	8.07794	3.34648	6.58721e-16	7.19386e-14	UP
CDC6	765.929	0.385768	8.80661	3.39792	1.28993e-18	2.1494e-16	UP
TOP2A	6604.65	0.482107	10.4863	5.05571	9.9842e-26	4.42122e-23	UP
KIF18B	815.142	0.556675	10.0421	5.59647	9.95575e-24	3.46053e-21	UP
MAPT	1760.55	0.476272	-5.42003	-2.58148	5.95894e-08	1.32847e-06	DOWN
PRR11	1176.03	0.4261	9.09259	3.87496	9.67044e-20	1.86075e-17	UP
BRIP1	398.043	0.419324	6.47059	2.71376	9.76207e-11	4.03025e-09	UP
KPNA2	7462.4	0.400533	6.90842	2.76706	4.90065e-12	2.65803e-10	UP
TK1	2269.17	0.439107	8.01368	3.51902	1.11329e-15	1.19562e-13	UP
BIRC5	2306.84	0.456523	12.0452	5.50086	2.05587e-33	3.16466e-30	UP
TYMS	1766.23	0.538543	6.11681	3.29424	9.54685e-10	3.23492e-08	UP
NDC80	1100.14	0.416185	11.9276	4.96681	8.49546e-33	1.14427e-29	UP
IMPA2	2665.48	0.495286	4.26232	2.11106	2.02315e-05	0.00021303	UP
LAMA3	3579.54	0.431951	-5.63687	-2.43488	1.7317e-08	4.38362e-07	DOWN
GINS1	742.82	0.301046	10.3259	3.10901	5.38137e-25	2.09588e-22	UP
TPX2	5300.9	0.439215	11.901	5.22761	1.16935e-32	1.45386e-29	UP
FAM83D	1171.76	0.438488	11.3212	4.96636	1.03082e-29	8.3306e-27	UP
UBE2C	2613.95	0.376608	15.7411	5.93126	7.90308e-56	2.55475e-51	UP
TSHZ2	1882.25	0.334266	-9.52491	-3.184	1.65182e-21	4.27173e-19	DOWN
AURKA	1224.17	0.339386	12.1649	4.12946	4.77783e-34	8.58046e-31	UP
EDN3	206.834	0.893572	-2.57633	-2.30047	0.00998545	0.0373945	DOWN
LMNB2	3912.72	0.383556	5.68243	2.17954	1.32797e-08	3.44803e-07	UP
UHRF1	710.953	0.472399	8.69798	4.11007	3.37851e-18	5.15159e-16	UP
CNN1	6395.11	0.533578	-8.47512	-4.52192	2.34847e-17	3.12414e-15	DOWN
CCNE1	559.27	0.518437	6.93724	3.59725	3.99837e-12	2.2213e-10	UP
COX7A1	1045.51	0.508634	-5.20844	-2.64926	1.90432e-07	3.6928e-06	DOWN
PPP1R14A	775.075	0.571648	-4.26282	-2.43684	2.01864e-05	0.000212625	DOWN
IL4I1	645.085	0.608829	5.61985	3.42182	1.91118e-08	4.74872e-07	UP
UBE2S	1184.71	0.402629	7.83091	3.15317	4.84346e-15	4.59175e-13	UP
PRAME	1894.65	0.678161	7.60372	5.15486	2.87748e-14	2.40355e-12	UP
MMP11	6556.41	0.627258	9.35657	5.86734	8.23669e-21	1.84288e-18	UP
CENPM	330.06	0.429655	8.86489	3.81129	7.65798e-19	1.34539e-16	UP
JAM2	2025.25	0.424284	-5.96298	-2.53004	2.47683e-09	7.52501e-08	DOWN
ADAMTS5	3144.08	0.458044	-6.94995	-3.18345	3.65404e-12	2.04361e-10	DOWN
FAM3B	568.536	0.710428	-3.75786	-2.66948	0.000171372	0.00132912	DOWN
TFF3	806.276	0.608799	-7.83693	-4.7733	4.61699e-15	4.44193e-13	DOWN
TFF1	328.809	0.84862	-7.5419	-6.42157	4.63185e-14	3.69702e-12	DOWN
CBS	85.625	0.627888	5.27235	3.31467	1.34686e-07	2.72799e-06	UP

## Sheet: Table S2 DElncRNAs_TCGA
Table S2 Differentially expressed lncRNAs of TNBC samples in the TCGA database
gene	baseMean	lfcSE	stat	log2FoldChange	pvalue	padj	change
AL391845.2	5.90511	0.714123	3.64263	2.63426	0.000269864	0.00195072	UP
AL589739.1	3.26088	0.821689	-2.82258	-2.33781	0.00476389	0.0207292	DOWN
PRDM16-DT	74.292	0.568887	-7.7392	-4.42403	1e-14	9.06e-13	DOWN
LINC00337	21.7225	0.69309	4.50782	3.13663	6.55e-06	8.02e-05	UP
AL365194.1	1.55073	0.98853	-2.93426	-2.90002	0.00334348	0.0156255	DOWN
LINC01714	2.39493	0.90809	2.97493	2.7552	0.00293059	0.0140555	UP
AL928921.1	3.40753	0.995087	-3.86003	-3.85407	0.000113375	0.000933982	DOWN
AC243836.1	3.38738	0.935667	-3.83728	-3.6015	0.000124405	0.0010117	DOWN
AL391883.1	4.5624	0.87533	-4.1183	-3.63625	3.82e-05	0.000370918	DOWN
AL031985.3	236.221	0.338132	5.93115	2.00574	3.01e-09	9.05e-08	UP
AL139220.2	66.4245	0.533332	4.36849	2.33072	1.25e-05	0.000140718	UP
AL135960.1	21.4171	0.575916	-5.41851	-3.13326	6.01e-08	1.34e-06	DOWN
AC096541.1	4.69956	0.654558	-4.17315	-4.24629	3e-05	0.000300849	DOWN
AL109659.2	19.5952	0.565233	-3.92989	-2.2255	8.5e-05	0.000729878	DOWN
AL445183.2	2.47185	0.801838	-3.28817	-2.70068	0.00100843	0.00584829	DOWN
LINC01771	3.13688	0.807556	2.84421	2.33719	0.00445221	0.0196293	UP
AC093425.1	14.6089	0.765704	-4.5368	-3.5167	5.71e-06	7.12e-05	DOWN
AC099792.1	3.16799	0.857956	-3.81262	-3.34598	0.000137499	0.00110156	DOWN
LINC00466	5.71669	0.845569	3.68692	3.17491	0.000226981	0.00168676	UP
AC096543.2	1.27782	0.988488	2.84374	2.80992	0.00445879	0.0196557	UP
FOXD3-AS1	126.933	0.731221	5.05793	3.6993	4.24e-07	7.49e-06	UP
LINC01359	37.1398	0.41376	-7.32598	-3.04032	2.37e-13	1.67e-11	DOWN
AL357078.3	4.0894	0.694014	-3.61648	-2.56181	0.000298635	0.00211936	DOWN
GNG12-AS1	54.9494	0.417004	-5.16019	-2.15326	2.47e-07	4.63e-06	DOWN
AL138789.1	2.66298	0.802036	4.48954	3.62526	7.14e-06	8.66e-05	UP
DEPDC1-AS1	2.31197	0.915397	3.57248	3.27301	0.000353621	0.00244517	UP
AL031429.1	6.02218	0.848339	-2.92958	-2.49647	0.00339426	0.0158216	DOWN
AL031429.2	27.1635	0.658525	-7.03182	-4.74495	2.04e-12	1.2e-10	DOWN
AL035409.1	32.6783	0.796844	3.55831	2.84276	0.000373246	0.0025606	UP
LINC01763	2.54138	0.945845	2.71989	2.56114	0.0065303	0.026674	UP
AL109741.1	20.3541	0.499983	-5.45262	-2.73548	4.96e-08	1.13e-06	DOWN
AC000032.1	4.4739	1.11591	-2.57874	-2.95326	0.00991611	0.0371823	DOWN
AL158847.1	7.9353	0.725148	-5.41338	-4.11651	6.18e-08	1.38e-06	DOWN
LINC01750	20.5865	0.678159	-3.00946	-2.03993	0.00261714	0.0128087	DOWN
AL445426.1	27.9696	0.656724	-5.58272	-3.68833	2.37e-08	5.78e-07	DOWN
LINC01356	20.5215	0.591135	3.42106	2.02461	0.00062377	0.00393152	UP
LINC01357	11.4388	0.630372	3.68481	2.33389	0.00022887	0.00169884	UP
NGF-AS1	29.1303	0.818155	-6.34755	-5.44611	2.19e-10	8.43e-09	DOWN
C1orf137	1.46505	1.08575	2.7969	3.05001	0.00515958	0.0221264	UP
WARS2-IT1	22.0188	0.560904	-4.30692	-2.42022	1.66e-05	0.000178494	DOWN
AC244453.2	33.5606	0.709286	5.30808	3.78317	1.11e-07	2.29e-06	UP
AC244021.1	39.3795	0.553515	-4.70564	-2.60889	2.53e-06	3.52e-05	DOWN
AL592494.2	12.1628	0.728554	4.96458	3.68958	6.89e-07	1.15e-05	UP
LINC01632	6.0098	1.23032	-2.81621	-3.495	0.00485936	0.0210623	DOWN
LINC01731	3.91996	0.808901	3.95585	3.31568	7.63e-05	0.000668085	UP
AC245100.6	12.6758	0.697505	4.17479	2.93152	2.98e-05	0.000299054	UP
AC243772.2	69.6183	0.528956	6.60048	3.49858	4.1e-11	1.84e-09	UP
FLG-AS1	47.0968	0.543009	-4.72759	-2.56997	2.27e-06	3.21e-05	DOWN
DCST1-AS1	208.563	0.489555	4.47108	2.18913	7.78e-06	9.34e-05	UP
ASH1L-IT1	1.46612	0.915386	2.53847	2.35051	0.0111337	0.0407276	UP
AL139412.1	46.2816	0.523003	6.74207	3.53783	1.56e-11	7.64e-10	UP
CADM3-AS1	132.27	0.629044	-7.23225	-4.55926	4.75e-13	3.2e-11	DOWN
AL591806.1	6.29	0.645979	3.5137	2.28962	0.000441913	0.00294663	UP
AL596087.2	8.11811	0.722927	3.91253	2.85638	9.13e-05	0.000777776	UP
LINC01675	3.65315	0.961063	3.0628	3.01224	0.0021928	0.0111296	UP
GORAB-AS1	47.9466	0.441436	5.48764	2.42476	4.07e-08	9.42e-07	UP
LINC01645	3.93203	0.847213	-5.12973	-4.34629	2.9e-07	5.37e-06	DOWN
LINC00862	24.058	0.642482	-3.71568	-2.39137	0.000202661	0.00152887	DOWN
AC097065.2	3.66599	0.867619	-2.51185	-2.20882	0.0120099	0.0432571	DOWN
AL445483.1	19.3531	0.642276	4.03005	2.595	5.58e-05	0.000510092	UP
AL513217.1	7.98328	0.679077	-3.58486	-2.44877	0.000337265	0.00234865	DOWN
ELF3-AS1	98.4378	0.398615	5.31688	2.12008	1.06e-07	2.2e-06	UP
PCAT6	385.164	0.398266	6.00458	2.39163	1.92e-09	6e-08	UP
ERLNC1	2.29783	0.756123	-3.01323	-2.33516	0.00258483	0.0126794	DOWN
LEMD1-AS1	8.8127	0.700455	3.51631	2.47663	0.000437584	0.0029238	UP
AC098936.1	17.1084	0.703361	4.63244	3.28223	3.61e-06	4.79e-05	UP
AL591846.2	10.5743	0.543251	3.87227	2.11021	0.000107827	0.00089504	UP
MIR29B2CHG	454.52	0.414068	-6.99799	-2.89804	2.6e-12	1.49e-10	DOWN
MIR205HG	1852.92	0.793421	-5.04219	-3.99626	4.6e-07	8.05e-06	DOWN
HSD11B1-AS1	227.563	0.695674	-5.25791	-3.65737	1.46e-07	2.93e-06	DOWN
AC096637.2	11.3086	0.714805	4.09723	2.94782	4.18e-05	0.000400592	UP
AC092803.1	6.78307	0.734552	4.90186	3.73289	9.49e-07	1.52e-05	UP
LINC01740	10.5395	0.592198	5.0968	3.04969	3.45e-07	6.26e-06	UP
TGFB2-AS1	61.5821	0.655113	3.23766	2.12199	0.00120514	0.00678817	UP
LYPLAL1-AS1	41.7646	0.572174	-5.16719	-2.96207	2.38e-07	4.48e-06	DOWN
LINC01705	8.66406	0.910503	6.13996	5.60577	8.25e-10	2.85e-08	UP
AL359979.2	5.48054	0.713878	3.54295	2.55491	0.000395674	0.0026871	UP
BX321878.1	5.60277	0.845791	-2.97843	-2.54757	0.00289725	0.0139225	DOWN
LINC01348	82.1433	0.587774	3.32945	2.78657	0.000870171	0.00518892	UP
AL591686.1	41.8849	0.813982	-6.02703	-4.96916	1.67e-09	5.33e-08	DOWN
KIF26B-AS1	7.19535	1.12202	3.51362	3.96635	0.000442052	0.00294695	UP
AL390860.1	4.83679	0.804234	-2.68174	-2.18245	0.00732398	0.0291847	DOWN
AC093326.1	2.0517	0.825476	-3.87944	-3.2012	0.000104695	0.000873516	DOWN
AC093390.1	2.61653	0.531726	-2.81239	-2.63661	0.00491748	0.0212659	DOWN
EIPR1-IT1	10.2317	0.694232	3.97795	2.78501	6.95e-05	0.000615955	UP
AC108025.1	1.45628	1.12574	2.59455	2.94987	0.00947159	0.0358523	UP
AC010729.2	4.53877	0.705094	4.11381	2.97797	3.89e-05	0.000377345	UP
U91324.1	1.04086	0.971061	-2.90135	-2.80914	0.00371563	0.0170085	DOWN
AC082651.1	3.07592	0.828788	-4.44501	-3.68718	8.79e-06	0.000103612	DOWN
AC010969.1	36.6255	0.757123	-3.62814	-2.74639	0.00028547	0.00204433	DOWN
AC130710.1	1.58913	0.863418	-3.28571	-2.83546	0.00101727	0.00588692	DOWN
AC010745.4	1.27479	1.09833	-2.5604	-2.83849	0.0104551	0.0387761	DOWN
AC018742.1	3.55633	0.882302	-3.45968	-3.151	0.000540816	0.00348881	DOWN
AC012073.1	84.0999	0.369394	7.66859	2.83538	1.74e-14	1.5e-12	UP
AC104699.1	17.5286	0.668264	3.43205	2.29877	0.00059904	0.00380145	UP
LINC01460	10.2051	0.744339	3.81509	2.86032	0.000136132	0.00109386	UP
AC019171.1	80.0599	0.721097	3.57496	2.57801	0.000350283	0.00242467	UP
LINC02580	21.8748	0.354315	-8.16708	-2.90863	3.16e-16	3.56e-14	DOWN
LINC01833	564.378	0.661316	5.98397	3.95712	2.18e-09	6.69e-08	UP
SIX3-AS1	61.9253	0.788504	5.88394	4.6615	4.01e-09	1.17e-07	UP
AC012354.1	19.1991	0.82392	4.6232	3.84545	3.78e-06	4.99e-05	UP
AC010967.1	2.37664	0.832427	3.22829	2.72877	0.00124535	0.00697817	UP
LINC01185	3.24765	0.786858	2.74972	2.18768	0.00596468	0.0248025	UP
AC092155.1	7.43121	0.780535	-4.74726	-3.85501	2.06e-06	2.96e-05	DOWN
LINC02576	17.5711	0.696895	3.49222	2.44131	0.00047902	0.00315501	UP
LINC01888	1.94335	0.891801	-2.9123	-2.61706	0.00358774	0.0165304	DOWN
ATP6V1B1-AS1	12.3399	0.736349	3.95536	2.93016	7.64e-05	0.000669022	UP
AC010913.1	11.5293	0.420969	4.76953	2.01352	1.85e-06	2.7e-05	UP
AC105053.1	3.30551	0.718699	-4.39034	-3.27964	1.13e-05	0.000129065	DOWN
AC244205.1	23.2341	0.599763	4.30777	2.59148	1.65e-05	0.000177993	UP
AC008268.1	212.747	0.987693	-8.79893	-8.85308	1.38e-18	2.28e-16	DOWN
AC092667.1	20.3799	0.726084	-7.71438	-5.94957	1.22e-14	1.08e-12	DOWN
AC068057.1	4.53181	0.930488	-5.01843	-4.68145	5.21e-07	8.94e-06	DOWN
LINC01886	3.93022	0.924546	-3.64348	-3.40538	0.000268978	0.00194519	DOWN
AC017002.3	7.21673	0.633285	3.62373	2.30997	0.000290379	0.00207077	UP
AC017002.2	2.46401	0.925438	3.23897	3.05415	0.00119962	0.00676298	UP
PGM5P4-AS1	5.94369	0.650525	-5.2787	-5.00723	1.3e-07	2.65e-06	DOWN
FAM138B	1.3822	1.03352	-2.92986	-3.03305	0.00339115	0.0158117	DOWN
AC104653.1	20.8064	0.589731	3.44869	2.03763	0.000563316	0.00360447	UP
LINC01191	7.89345	0.635888	4.73807	3.05814	2.16e-06	3.08e-05	UP
DPP10-AS1	16.0017	0.871696	4.07744	3.59084	4.55e-05	0.000430023	UP
LINC01956	327.246	0.519374	8.44605	4.38947	3.01e-17	3.91e-15	UP
AC013275.1	8.96087	0.813113	-4.34782	-3.63001	1.37e-05	0.000152376	DOWN
AC073257.2	36.3749	0.645853	-4.05863	-2.62565	4.94e-05	0.000460247	DOWN
AC133785.1	18.1216	0.928452	2.94833	2.74327	0.00319496	0.015095	UP
LINC01087	58.3798	0.908477	-4.97747	-4.55273	6.44e-07	1.08e-05	DOWN
AC011893.1	2.92664	0.925284	4.23779	3.92563	2.26e-05	0.000234929	UP
AC016910.1	2.55612	0.935845	-3.07646	-2.9291	0.00209472	0.0107295	DOWN
ZEB2-AS1	18.1277	0.478048	-4.83935	-2.31945	1.3e-06	1.99e-05	DOWN
LINC01412	3.09088	0.811974	-3.99036	-3.30723	6.6e-05	0.000589608	DOWN
AC092484.1	16.6441	1.07138	5.29986	5.74802	1.16e-07	2.38e-06	UP
AC009227.1	5.49922	0.800557	3.60527	2.93287	0.000311828	0.00219611	UP
AC008063.1	3.66859	0.828866	-3.41454	-2.90765	0.000638897	0.00401029	DOWN
RAPGEF4-AS1	4.30628	0.731918	-3.60209	-2.6934	0.000315666	0.00221928	DOWN
AC106900.1	7.80649	0.991967	3.87076	3.84065	0.000108495	0.000899054	UP
HOXD-AS2	48.9541	0.466806	-5.37985	-2.51387	7.45e-08	1.62e-06	DOWN
AC092162.2	6.44174	0.63627	-3.86494	-2.48241	0.000111118	0.000917498	DOWN
AC010680.5	4.1669	0.653442	-3.05035	-2.01152	0.00228577	0.011486	DOWN
AC010680.1	3.51225	0.653701	-3.19351	-2.11677	0.00140555	0.00771928	DOWN
SCHLAP1	3.87696	1.16032	2.51206	2.90748	0.012003	0.043237	UP
AC098617.1	10.1757	0.815747	-5.76946	-4.90272	7.95e-09	2.16e-07	DOWN
AC068135.2	2.73169	1.00028	2.99371	3.04999	0.00275604	0.0133607	UP
HECW2-AS1	62.5954	0.620629	-4.43687	-2.75669	9.13e-06	0.000106944	DOWN
AC097717.1	6.56157	0.557071	4.25554	2.39217	2.09e-05	0.000218807	UP
AC079354.2	2.10815	0.837448	3.9571	3.34111	7.59e-05	0.000664978	UP
AC012462.1	1.37652	1.12614	2.52478	2.86416	0.0115772	0.0419981	UP
LINC01614	77.3889	0.685662	7.43918	5.15194	1.01e-13	7.51e-12	UP
AC007563.1	2.2899	0.829185	-4.04223	-3.35523	5.29e-05	0.000489291	DOWN
AC093083.1	1.32393	1.0945	2.67147	2.94283	0.0075519	0.0299464	UP
SPATA3-AS1	10.3239	0.566029	3.79124	2.154	0.000149896	0.0011869	UP
AC013726.1	56.0276	0.761522	-6.1297	-4.70684	8.8e-10	3.02e-08	DOWN
AC097713.1	18.9645	0.899824	-4.98428	-4.64504	6.22e-07	1.05e-05	DOWN
AC010148.1	3.79596	0.772038	-3.54661	-2.79954	0.000390215	0.00265784	DOWN
AC084030.1	3.73023	0.891182	-3.76672	-3.36823	0.000165404	0.00129058	DOWN
AC112721.1	3.20853	0.846288	3.4497	3.01358	0.000561216	0.00359593	UP
AC112721.2	4.32219	0.974255	3.48714	3.52339	0.000488212	0.00320901	UP
AC012485.2	8.09232	0.908939	-2.76613	-2.52145	0.00567265	0.0238489	DOWN
AC011298.1	1.13372	0.984876	2.69183	2.64837	0.00710615	0.0284835	UP
AC104809.2	4.21908	0.710107	-3.98395	-2.8918	6.78e-05	0.00060358	DOWN
BOK-AS1	18.6249	0.745755	-4.67707	-3.52307	2.91e-06	3.99e-05	DOWN
CHL1-AS1	2.25575	0.923621	-3.40723	-3.14531	0.000656263	0.00410097	DOWN
AC093496.1	11.4817	0.903783	-5.63191	-5.1664	1.78e-08	4.48e-07	DOWN
LINC01267	2.97119	0.901618	-3.93273	-3.55515	8.4e-05	0.000722248	DOWN
AC092422.1	1.06831	1.08661	2.52542	2.76255	0.011556	0.0419352	UP
RBMS3-AS3	18.6878	0.754307	-2.87228	-2.17131	0.00407525	0.018279	DOWN
RBMS3-AS2	2.13928	0.849076	-2.97023	-2.59265	0.00297573	0.0142235	DOWN
LINC01985	8.81121	0.774129	-3.26475	-2.54063	0.00109561	0.0062751	DOWN
AC096921.2	103.155	0.460285	-6.28072	-2.89291	3.37e-10	1.26e-08	DOWN
LINC02033	5.22444	0.575177	-2.60398	2.57841	0.00921481	0.0350531	UP
AC006058.3	11.1117	1.03066	3.1869	3.32145	0.00143804	0.00787235	UP
AC121247.1	27.816	0.522545	-4.71366	-2.46627	2.43e-06	3.4e-05	DOWN
ESRG	7.29707	0.91851	-4.47106	-4.18462	7.78e-06	9.34e-05	DOWN
FAM3D-AS1	13.2583	0.64932	3.84164	2.50473	0.000122213	0.000997529	UP
AC092040.1	9.25018	0.745929	-3.98506	-3.00255	6.75e-05	0.000601437	DOWN
PRICKLE2-AS2	2.33471	0.894989	-2.45361	-2.22276	0.014143	0.0492075	DOWN
ADAMTS9-AS1	284.965	0.685739	-4.52317	-3.1018	6.09e-06	7.53e-05	DOWN
ADAMTS9-AS2	131.377	0.503837	-7.23841	-3.65121	4.54e-13	3.08e-11	DOWN
SAMMSON	7.22606	0.868036	2.54719	2.21801	0.0108594	0.0399527	UP
PDZRN3-AS1	4.4742	0.899862	-3.43869	-3.18907	0.000584526	0.00371908	DOWN
AC110491.1	5.73194	0.810122	-3.88533	-3.23652	0.000102192	0.00085504	DOWN
NECTIN3-AS1	6.43176	0.551292	-4.01765	-2.23313	5.88e-05	0.000533146	DOWN
AC092916.1	37.8662	1.17796	2.901	3.27468	0.00371974	0.0170125	UP
SIDT1-AS1	1.18171	1.0778	-2.57925	-2.79752	0.00990153	0.0371405	DOWN
AC073352.1	3.96422	0.638518	3.30953	2.1361	0.000934524	0.00550163	UP
ALDH1L1-AS2	69.1057	0.826702	-7.29399	-6.31859	3.01e-13	2.09e-11	DOWN
AC016924.1	27.105	0.733542	-5.3188	-3.92839	1.04e-07	2.18e-06	DOWN
AC063919.1	2.83127	1.0231	-3.78376	-3.89201	0.000154475	0.00121913	DOWN
AC092969.1	37.1208	0.77937	5.65313	4.45549	1.58e-08	4.02e-07	UP
AC092979.1	1.32054	0.931174	-3.0307	-2.82181	0.00243989	0.0120988	DOWN
AC093001.1	617.6	0.86441	-8.46365	-7.3539	2.59e-17	3.43e-15	DOWN
AC117395.1	6.26469	0.735914	3.18777	2.3624	0.00143377	0.00785424	UP
AC117386.2	10.81	0.969035	3.75474	3.6967	0.000173521	0.00134193	UP
LINC01213	6.75902	0.770338	2.84559	2.20246	0.00443296	0.0195631	UP
CLRN1-AS1	3.0996	0.770717	2.99343	2.34309	0.00275861	0.0133676	UP
LINC02066	2.46998	0.865642	-4.30667	-3.72524	1.66e-05	0.000178615	DOWN
AADACL2-AS1	11.3672	0.882229	-2.46809	-2.18363	0.0135835	0.0477226	DOWN
ARHGEF26-AS1	278.856	0.639854	3.95448	2.53038	7.67e-05	0.000670658	UP
PLCH1-AS1	2.26692	0.768581	2.92785	2.29554	0.00341317	0.0158937	UP
LINC02082	5.61816	0.980735	-4.54408	-4.47723	5.52e-06	6.9e-05	DOWN
AC092954.1	1.50661	1.00722	-3.18338	-3.21361	0.00145564	0.00794312	DOWN
AC074033.1	2.44732	0.823243	-3.57618	-2.99303	0.000348655	0.00241496	DOWN
AC007849.1	2.21041	0.973566	-3.09559	-3.01068	0.00196421	0.0101706	DOWN
LINC01014	2.753	1.12977	3.14568	3.60567	0.00165703	0.0088406	UP
AC107294.1	20.4086	0.846534	2.71308	2.29934	0.00666611	0.0271123	UP
ADIPOQ-AS1	21.8896	0.89562	-5.14574	-4.72749	2.66e-07	4.97e-06	DOWN
AC108676.1	94.9954	0.823937	3.61251	2.97598	0.000303244	0.00214688	UP
LINC01968	4.72724	0.749091	3.10548	2.35515	0.00189972	0.00990169	UP
AC128709.1	3.62102	0.865612	2.8049	2.46905	0.00503315	0.0216704	UP
LINC02600	44.3243	0.739204	-4.76638	-3.52742	1.88e-06	2.73e-05	DOWN
AC097382.2	3.77972	0.694056	-2.96685	-2.08447	0.00300872	0.0143557	DOWN
LINC02447	31.9451	0.396885	-5.22348	-2.07491	1.76e-07	3.44e-06	DOWN
AFAP1-AS1	1792.79	0.820259	6.08337	4.97854	1.18e-09	3.91e-08	UP
AC097381.3	3.53655	0.967539	3.51994	3.52027	0.000431652	0.00289133	UP
AC005699.1	2.16917	0.951831	-3.22564	-3.08399	0.0012569	0.00703193	DOWN
LINC01096	29.3474	0.58238	6.36301	3.72873	1.98e-10	7.72e-09	UP
LINC00504	198.989	0.573486	-8.92689	-5.13924	4.38e-19	8.05e-17	DOWN
LINC02438	3.82031	0.972714	4.24591	4.14871	2.18e-05	0.000227388	UP
AC024230.1	10.1743	0.892527	3.39357	3.04785	0.000689869	0.00426808	UP
LINC02473	102.605	0.624444	6.22832	3.89549	4.71e-10	1.7e-08	UP
LINC02265	1.84907	0.93091	-2.70138	-2.52533	0.00690519	0.0278714	DOWN
AC131953.1	3.866	0.849245	-2.94388	-2.55328	0.0032413	0.0152693	DOWN
LINC02475	22.0236	0.891624	3.73629	3.33963	0.000186758	0.00142891	UP
AC104072.1	2.70494	0.917463	-4.43794	-4.07344	9.08e-06	0.000106454	DOWN
AC110792.2	2.0037	0.980594	-3.66295	-3.59986	0.000249326	0.00182182	DOWN
AC111000.4	4.07261	0.959676	-4.64004	-4.46506	3.48e-06	4.65e-05	DOWN
AC107072.2	8.34907	0.739814	-3.61995	-2.70019	0.000294656	0.00209526	DOWN
AC107072.1	1.78843	1.08289	-2.66629	-2.90739	0.00766942	0.030312	DOWN
LINC00989	21.6618	0.553024	-5.73346	-3.18952	9.84e-09	2.63e-07	DOWN
AC092542.1	2.34528	0.834576	-2.81792	-2.41319	0.00483356	0.0209703	DOWN
AC079160.1	8.82793	1.01886	3.29718	3.40909	0.000976626	0.00569246	UP
AC108516.1	1.96137	1.05582	-3.17441	-3.36604	0.00150142	0.00813386	DOWN
AC093895.1	7.61541	0.8494	5.21341	4.5559	1.85e-07	3.61e-06	UP
ARHGEF38-IT1	3.319	0.995729	-3.07309	-3.00926	0.00211853	0.0108275	DOWN
LEF1-AS1	7.51044	0.545006	3.86534	2.117	0.000110934	0.000916448	UP
LINC02435	2.11319	0.961177	-3.86613	-3.72547	0.000110577	0.000913962	DOWN
LINC01091	35.5604	0.524815	-4.73652	-2.48971	2.17e-06	3.09e-05	DOWN
LINC02511	36.1001	0.666531	-7.44808	-5.09941	9.47e-14	7.07e-12	DOWN
LINC02172	4.37102	0.635742	-3.27329	-2.10202	0.00106305	0.00611367	DOWN
AC109927.1	3.84279	0.889078	-2.72937	-2.47241	0.00634546	0.0260706	DOWN
AC096733.2	69.8004	0.401783	-6.31958	-2.54118	2.62e-10	9.95e-09	DOWN
AC107223.1	5.39032	0.640387	-4.16045	-2.71063	3.18e-05	0.000316306	DOWN
AC079298.3	38.3433	0.689201	-3.47002	-2.39511	0.000520422	0.00337611	DOWN
AC104407.1	141.402	0.902916	-9.13124	-8.44165	6.77e-20	1.31e-17	DOWN
FAM198B-AS1	445.587	0.420758	-8.95101	-3.76762	3.52e-19	6.51e-17	DOWN
AC084866.1	10.7661	0.958349	-3.62781	-3.54474	0.000285834	0.00204615	DOWN
LINC01612	15.2474	0.932641	-4.68074	-4.51988	2.86e-06	3.93e-05	DOWN
LINC02382	1.41088	0.970035	-2.9098	-2.81942	0.00361664	0.0166399	DOWN
LINC02504	2.16211	1.05175	-3.30634	-3.4953	0.000945217	0.00554539	DOWN
AC105914.2	1.77934	1.05509	-2.4671	-2.60896	0.0136213	0.0478247	DOWN
TENM3-AS1	98.3477	0.759364	-3.45484	-2.62456	0.000550628	0.00353799	DOWN
AC019193.3	2.7298	0.749612	-3.30944	-2.5488	0.000934832	0.00550244	DOWN
LINC01093	5.52253	0.873242	-4.93896	-4.33876	7.85e-07	1.29e-05	DOWN
LINC02437	4.12976	0.79862	2.96337	4.20548	0.00304293	0.0144911	UP
AC110772.1	3.45228	0.865568	-3.18551	-2.81582	0.00144501	0.00790646	DOWN
AC110772.2	11.1569	0.623003	-5.78992	-3.69254	7.04e-09	1.94e-07	DOWN
AC021087.4	89.0326	0.784203	4.89295	3.84318	9.93e-07	1.58e-05	UP
AC114291.1	4.45955	0.933868	-3.05334	-2.81366	0.00226307	0.0114003	DOWN
LINC01511	2.79663	1.01524	-2.4908	-2.5507	0.0127455	0.0453457	DOWN
LSINCT5	12.9567	0.798604	-3.2978	-2.64426	0.000974459	0.00568291	DOWN
LINC02145	10.0811	0.47951	-5.88844	-2.85555	3.9e-09	1.14e-07	DOWN
LINC01018	93.1926	0.797032	3.26572	2.60256	0.00109185	0.0062569	UP
LINC02236	8.0992	0.813738	3.37427	2.7611	0.000740128	0.00453046	UP
AC122710.2	5.80596	0.866003	4.66128	4.08846	3.14e-06	4.26e-05	UP
LINC02226	1.07728	0.957229	-2.65316	-2.53441	0.0079743	0.0312501	DOWN
AC012640.1	1.4204	0.850332	2.51544	4.54333	0.0118884	0.0429012	UP
LINC02100	3.74398	0.731711	2.91476	2.16033	0.00355966	0.0164331	UP
AC010457.1	14.9302	0.691292	-5.59563	-3.94898	2.2e-08	5.41e-07	DOWN
LIFR-AS1	105.922	0.349215	-7.51013	-2.62396	5.91e-14	4.61e-12	DOWN
LINC02104	31.1973	0.709817	-3.49441	-2.48304	0.000475104	0.00313561	DOWN
AC114956.2	39.3447	0.748887	5.1129	3.84815	3.17e-07	5.8e-06	UP
AC114956.1	40.1017	0.741069	4.27126	3.17223	1.94e-05	0.000205604	UP
FGF10-AS1	12.8942	0.698305	-5.30978	-3.7854	1.1e-07	2.27e-06	DOWN
AC093297.1	3.03094	0.898902	-3.2804	-3.04974	0.0010366	0.0059844	DOWN
AC022431.1	2.57471	0.658387	-3.08194	-2.06673	0.00205656	0.0105574	DOWN
LINC02101	1.37584	1.00738	-3.09112	-3.12205	0.00199404	0.0102976	DOWN
C5orf64	17.6864	0.67336	-6.51599	-4.53769	7.22e-11	3.06e-09	DOWN
AC025176.1	2.2582	0.770548	3.02657	2.36955	0.00247345	0.0122314	UP
LINC02065	7.83772	0.634077	3.34581	2.13091	0.000820431	0.00493419	UP
MAST4-AS1	13.9105	0.52312	-4.74003	-2.49129	2.14e-06	3.05e-05	DOWN
AC093278.2	315.906	0.3666	-6.14124	-2.25156	8.19e-10	2.83e-08	DOWN
LINC01385	4.37762	1.02499	4.34699	4.49031	1.38e-05	0.000152793	UP
RASGRF2-AS1	11.6363	0.546278	-4.26356	-2.33925	2.01e-05	0.000212059	DOWN
LINC00461	79.3795	0.873916	5.04136	4.40415	4.62e-07	8.07e-06	UP
AC124854.1	1.26161	0.90544	-3.11343	-2.81505	0.00184926	0.00968552	DOWN
LINC02058	2.16307	1.03991	-3.06121	-3.1943	0.00220445	0.0111787	DOWN
AC008840.1	17.7857	0.627829	-4.06933	-2.563	4.71e-05	0.000442168	DOWN
AC008592.5	64.765	0.781269	3.53667	2.76459	0.000405206	0.00274031	UP
LINC00491	1.50059	1.14874	2.50919	2.92687	0.0121008	0.0435214	UP
LINC02115	2.55516	0.815829	-3.80328	-3.19348	0.000142793	0.00114002	DOWN
LINC01950	6.15355	0.951689	3.81288	3.69024	0.000137357	0.00110138	UP
AC008467.1	16.0506	0.424136	-5.17023	-2.19819	2.34e-07	4.42e-06	DOWN
AC010261.2	2.19136	0.787294	-3.2414	-2.62343	0.00118946	0.00671856	DOWN
AC079465.1	5.51192	0.586896	-4.6787	-2.80177	2.89e-06	3.96e-05	DOWN
LINC00992	39.3375	0.878673	2.92151	2.56802	0.0034834	0.016144	UP
LINC02147	5.4001	0.85537	-5.04596	-4.34966	4.51e-07	7.91e-06	DOWN
LINC02240	2.58872	1.08918	-3.27026	-3.59641	0.00107449	0.00616943	DOWN
LINC01843	11.0824	0.47381	-5.79553	-2.77108	6.81e-09	1.89e-07	DOWN
AC008406.3	5.82924	0.779916	3.58916	2.84131	0.000331744	0.00231419	UP
C5orf66-AS1	27.3006	0.861345	6.28272	5.73153	3.33e-10	1.24e-08	UP
AC116312.1	6.3638	0.719022	-4.32477	-3.18414	1.53e-05	0.000166864	DOWN
AC012613.2	3.93268	0.805386	-3.62519	-2.99234	0.000288753	0.00206327	DOWN
CARMN	817.212	0.486297	-9.94817	-4.83978	2.57e-23	8.39e-21	DOWN
CLMAT3	8.71914	0.705032	-5.10691	-3.71419	3.27e-07	5.97e-06	DOWN
AC091939.1	12.7747	0.811842	-5.33115	-4.49777	9.76e-08	2.06e-06	DOWN
LINC02202	149.594	0.466263	-9.35273	-4.37076	8.54e-21	1.89e-18	DOWN
LINC02159	11.3909	0.670085	4.01132	2.70378	6.04e-05	0.000546279	UP
AC011365.2	8.6202	0.521341	-4.01102	-2.10072	6.05e-05	0.000546674	DOWN
AC011365.1	29.3981	0.687284	-3.865	-2.65933	0.000111088	0.000917484	DOWN
AC011389.1	3.50373	0.686878	-3.45014	-2.41777	0.000560291	0.00359079	DOWN
LINC01366	6.77968	0.612921	-4.25301	-2.63744	2.11e-05	0.000220869	DOWN
AC034199.1	3.00812	0.760839	2.98348	2.31145	0.00284993	0.0137257	UP
AC008619.1	5.72756	0.813908	3.58421	2.97051	0.000338095	0.00235341	UP
AC027312.1	6.30627	0.796754	3.92052	3.19365	8.84e-05	0.000755617	UP
AC008514.1	104.257	0.515793	6.54143	3.37915	6.09e-11	2.63e-09	UP
AC091980.2	3.0344	1.13426	2.70037	3.14501	0.00692633	0.0279311	UP
AC022217.2	2.89376	0.994035	-2.53003	-2.46014	0.0114053	0.041519	DOWN
AC008663.1	62.9831	0.781413	-8.19641	-6.88923	2.48e-16	2.84e-14	DOWN
AC008663.3	23.2482	0.783048	-5.57319	-4.459	2.5e-08	6.07e-07	DOWN
LINC01942	2.91127	0.865727	-4.114	-3.56549	3.89e-05	0.000377148	DOWN
LINC01485	133.092	0.769757	-2.99268	-2.30362	0.00276541	0.0133924	DOWN
AC139491.2	5.64191	0.628362	3.24968	2.05316	0.00115535	0.00656142	UP
AC034213.1	16.5114	0.885377	3.81661	3.40539	0.000135297	0.00108797	UP
FOXCUT	99.4223	0.537341	7.87124	4.2423	3.51e-15	3.44e-13	UP
AL445309.1	23.9821	0.36814	-7.01524	-2.59096	2.3e-12	1.34e-10	DOWN
AL031058.1	123.554	0.383757	5.39385	2.07045	6.9e-08	1.52e-06	UP
LINC00518	124.116	1.06579	3.98262	4.16948	6.82e-05	0.000606487	UP
ELOVL2-AS1	9.68728	0.791108	-3.4818	-2.78112	0.000498053	0.00325972	DOWN
AL157373.2	20.3045	0.710382	3.61022	2.57123	0.000305938	0.00216406	UP
AL021807.1	54.9151	0.540301	4.43801	2.39941	9.08e-06	0.000106454	UP
LINC02570	5.39082	0.912025	3.14645	2.92217	0.00165263	0.00882147	UP
HCG22	5.26517	0.565845	-3.59503	-2.05009	0.000324355	0.0022695	DOWN
LINC02571	6.13088	0.985961	2.82287	2.80921	0.00475952	0.0207174	UP
LINC01016	26.5382	0.861693	-7.09762	-6.26182	1.27e-12	7.75e-11	DOWN
Z84484.1	11.6931	0.772582	3.74259	2.91536	0.000182135	0.00139925	UP
FOXP4-AS1	117.529	0.560977	4.77281	2.67852	1.82e-06	2.66e-05	UP
AL355802.2	21.9732	0.498163	4.85267	2.42338	1.22e-06	1.88e-05	UP
AL035670.1	1.74166	0.96657	-3.18911	-3.07836	0.0014271	0.00782038	DOWN
AL034374.1	44.8516	0.461255	-5.61424	-2.59301	1.97e-08	4.89e-07	DOWN
LINC01564	1.77976	0.868189	-2.50189	-2.21819	0.0123531	0.0442297	DOWN
AL512363.1	9.47315	0.807365	3.23069	2.62716	0.0012349	0.00692682	UP
AL049555.1	536.965	0.478046	5.35679	2.56107	8.47e-08	1.82e-06	UP
AL445250.1	22.5723	0.589235	4.25941	2.51529	2.05e-05	0.000215403	UP
AL391807.1	9.12589	0.540369	-5.62263	-3.08654	1.88e-08	4.69e-07	DOWN
AL357507.1	2.50685	0.861086	-4.73003	-4.06738	2.24e-06	3.18e-05	DOWN
LINC02542	30.8239	0.729089	2.77627	2.02512	0.00549863	0.0232625	UP
LINC02532	38.5059	0.773825	2.59256	2.00693	0.00952658	0.0360258	UP
AL024507.2	54.6791	0.354177	5.88121	2.08411	4.07e-09	1.19e-07	UP
ARMC2-AS1	1.9614	0.878414	-2.98316	-2.6473	0.00285289	0.0137359	DOWN
Z99289.1	33.0539	0.744215	-3.04803	-2.27157	0.00230349	0.0115509	DOWN
AL365214.2	17.8754	0.61446	-3.29934	-2.02977	0.000969125	0.00565792	DOWN
FO393415.1	12.5341	0.654641	-4.56916	-3.01276	4.9e-06	6.22e-05	DOWN
LINC01013	23.9602	0.692628	-3.83965	-2.66558	0.00012321	0.0010035	DOWN
AL591468.1	8.03522	0.813999	4.49863	3.78263	6.84e-06	8.34e-05	UP
AL355312.4	8.39048	0.794299	3.14168	2.50802	0.0016798	0.00894126	UP
AL356311.1	2.78345	0.811668	-4.45829	-3.62228	8.26e-06	9.82e-05	DOWN
AL049548.1	2.33805	1.15417	2.58702	2.99068	0.00968092	0.0364908	UP
AL355297.3	5.09065	0.510323	-4.3164	-2.22862	1.59e-05	0.00017227	DOWN
AL356417.2	91.9258	0.748409	5.34718	4.01018	8.93e-08	1.9e-06	UP
FNDC1-IT1	12.195	0.938564	3.26934	3.08412	0.00107798	0.00618616	UP
AL078604.2	9.83658	0.651415	2.73962	4.20647	0.0061511	0.0254304	UP
AL121956.1	23.419	0.905529	5.31958	4.98521	1.04e-07	2.18e-06	UP
LINC02487	477.907	0.840474	4.97091	4.17048	6.66e-07	1.12e-05	UP
AL606970.1	3.86744	0.953155	-4.32465	-4.1362	1.53e-05	0.000166899	DOWN
AL138918.1	1.32342	0.934717	-2.6999	-2.52375	0.00693602	0.0279394	DOWN
LINC02544	42.8527	0.718431	3.66181	2.63316	0.000250439	0.00182912	UP
LINC00574	9.10665	0.462754	-4.55489	-2.11868	5.24e-06	6.6e-05	DOWN
AL049612.1	4.96924	0.660526	-3.40684	-2.27633	0.000657206	0.00410528	DOWN
AC093627.6	11.7438	0.704789	-3.0911	-2.18427	0.00199416	0.0102976	DOWN
AC147651.3	3.31299	0.936805	-4.56301	-4.28189	5.04e-06	6.37e-05	DOWN
ELFN1-AS1	86.5933	0.959151	3.86227	3.68883	0.00011234	0.000926638	UP
AC073316.3	7.86338	0.807917	-3.87793	-3.19349	0.00010535	0.000877263	DOWN
RBAKDN	6.12296	0.919132	4.32782	4.00924	1.51e-05	0.000164798	UP
AC004160.1	87.5451	0.624451	-4.75311	-2.97113	2e-06	2.89e-05	DOWN
AC004160.2	13.8388	0.755598	-4.25947	-3.24041	2.05e-05	0.000215403	DOWN
LINC02587	93.4021	0.798027	-3.74864	-2.9932	0.000177797	0.00137138	DOWN
AC019117.2	5.43464	0.837118	2.58647	2.17822	0.00969637	0.036532	UP
AC003986.2	54.4492	0.709746	-5.9918	-4.27804	2.08e-09	6.41e-08	DOWN
AC003986.3	3.11	0.930691	-3.76422	-3.51681	0.000167072	0.00130055	DOWN
AC005062.1	54.0765	0.705388	-3.5658	-2.51626	0.000362741	0.00249914	DOWN
AC002480.1	19.8268	0.556995	-4.10872	-2.29221	3.98e-05	0.000384371	DOWN
AC073072.1	17.6813	0.455508	-5.32344	-2.43229	1.02e-07	2.14e-06	DOWN
KIAA0087	6.54306	0.740389	-2.76383	-2.0563	0.00571269	0.0239736	DOWN
AC004947.1	37.9638	0.543468	-8.13748	-4.4786	4.04e-16	4.51e-14	DOWN
HOXA11-AS	28.3707	0.75336	2.67091	2.01352	0.00756451	0.0299791	UP
AC007255.1	15.2586	0.621654	-4.13608	-2.57878	3.53e-05	0.000346382	DOWN
AC083864.2	1.65921	0.974176	-3.45319	-3.36358	0.000554003	0.00355543	DOWN
AC006960.3	2.30547	0.762349	-3.17677	-2.49429	0.00148928	0.00808028	DOWN
AC004837.2	20.895	0.76435	3.21054	2.46107	0.00132487	0.00735112	UP
LUARIS	21.585	0.695822	-4.87203	-3.41828	1.1e-06	1.72e-05	DOWN
AC237221.1	24.559	0.634865	-5.53013	-3.53801	3.2e-08	7.54e-07	DOWN
AC005089.1	8.23049	0.728193	-4.0462	-2.98174	5.21e-05	0.000482642	DOWN
ELN-AS1	29.9102	0.506485	-5.08238	-2.57948	3.73e-07	6.69e-06	DOWN
MAGI2-AS3	1398.55	0.399771	-6.76045	-2.70275	1.38e-11	6.82e-10	DOWN
AC002064.1	4.14999	0.793504	-3.73703	-3.02507	0.000186203	0.00142583	DOWN
AC002451.1	8.76124	0.792139	-3.25768	-2.59313	0.00112326	0.00640624	DOWN
DLX6-AS1	118.021	0.737414	4.49286	3.31382	7.03e-06	8.53e-05	UP
LNCPRESS1	2.29421	1.08991	-2.88359	-3.17125	0.00393171	0.0177683	DOWN
AC006329.1	182.813	0.473144	6.12722	2.90026	8.94e-10	3.06e-08	UP
LHFPL3-AS2	11.384	0.584286	-3.46445	-2.02974	0.000531308	0.0034384	DOWN
LINC02577	4.71263	0.843669	3.32519	2.86318	0.000883592	0.00524991	UP
AC073114.1	5.41833	0.916464	-4.10608	-3.78124	4.02e-05	0.000387746	DOWN
AC006159.1	4.21852	0.898221	-3.32659	-3.07582	0.000879167	0.00523195	DOWN
FEZF1-AS1	8.66023	0.758156	3.04791	2.32302	0.0023044	0.0115509	UP
AC007938.1	23.755	0.881712	-2.67616	-2.36023	0.0074472	0.0295893	DOWN
MESTIT1	67.9245	0.643462	-7.8059	-5.0786	5.91e-15	5.5e-13	DOWN
AC007938.2	9.22302	0.700541	-5.09396	-3.66877	3.51e-07	6.34e-06	DOWN
AC073342.2	4.14164	0.995359	2.95188	2.99616	0.00315847	0.0149467	UP
AC005486.1	2.98856	0.828854	-2.604	-2.19087	0.00921432	0.0350531	DOWN
AC093583.1	4.60079	0.683875	3.36208	2.3244	0.000773584	0.00470231	UP
MNX1-AS1	78.2126	0.711123	3.92011	2.78894	8.85e-05	0.000756509	UP
AC005481.1	7.69801	0.608661	-3.52853	-2.1592	0.000417876	0.0028154	DOWN
AC078993.1	83.1609	0.735706	-6.78518	-5.03546	1.16e-11	5.81e-10	DOWN
AC112493.1	8.66364	1.07531	3.34705	3.68373	0.000816779	0.00491588	UP
AC107419.1	10.2642	0.942965	3.67351	3.52012	0.000239239	0.00176404	UP
AL591501.1	1.51812	0.934151	-3.5879	-3.34831	0.000333357	0.00232444	DOWN
LINC01281	5.32862	0.844072	3.71378	3.20914	0.000204189	0.00153896	UP
LINC01283	1.06115	0.94122	2.83825	2.66472	0.00453612	0.0199069	UP
AC092198.1	9.07254	0.679963	3.2349	2.2066	0.00121686	0.00683987	UP
AC136489.1	5.32258	0.742788	-3.95865	-3.01314	7.54e-05	0.000661223	DOWN
AL354793.1	6.46566	0.649763	3.62674	2.37611	0.000287025	0.00205364	UP
LINC00891	6.61178	0.59497	-3.37049	-2.01574	0.000750334	0.00458339	DOWN
AL109946.1	10.4168	0.782744	3.55006	2.80124	0.000385141	0.00262826	UP
PLS3-AS1	37.0194	0.558709	3.8782	2.16835	0.000105231	0.00087673	UP
LINC01402	6.28671	0.637096	-3.87895	-2.4971	0.000104908	0.000874482	DOWN
FIRRE	252.77	0.715675	3.88787	2.78242	0.00010113	0.000848022	UP
AF067845.1	2.64475	1.0656	-3.15628	-3.3865	0.00159796	0.00857213	DOWN
AC019257.1	4.40628	0.831142	-5.43759	-4.51854	5.4e-08	1.22e-06	DOWN
AC245123.1	1.69669	0.852875	-4.23988	-3.60819	2.24e-05	0.000232979	DOWN
AC246817.2	13.5136	0.649044	-3.29167	-2.14367	0.000995927	0.00578514	DOWN
AC246817.1	6.99995	0.569256	-4.87259	-2.81707	1.1e-06	1.72e-05	DOWN
AC022784.1	116.002	0.633466	7.21151	4.58459	5.53e-13	3.66e-11	UP
AC022784.6	6.11978	0.624417	5.24905	3.37974	1.53e-07	3.05e-06	UP
AC023403.1	14.588	0.730693	5.10522	3.79409	3.3e-07	6.01e-06	UP
AC103719.1	2.03425	0.873896	-3.95666	-3.45377	7.6e-05	0.000666015	DOWN
AC105046.1	78.5913	0.82439	-4.06247	-3.35077	4.86e-05	0.000453422	DOWN
AC055854.1	10.9918	0.641967	-4.87874	-3.17133	1.07e-06	1.68e-05	DOWN
AC120193.1	3.75074	0.969282	3.54413	3.51153	0.000393917	0.00268021	UP
AC013643.2	2.61354	0.654103	-3.04991	-2.03093	0.00228907	0.0115009	DOWN
LINC02099	7.81339	0.755746	3.52948	2.69329	0.000416382	0.00280591	UP
AC044849.1	8.94406	0.659111	-3.04819	-2.01597	0.00230225	0.0115509	DOWN
AC087855.2	2.16463	0.936168	-2.89623	-2.77625	0.00377678	0.0172101	DOWN
AC124067.4	7.26988	0.578628	-5.13864	-3.02907	2.77e-07	5.14e-06	DOWN
AC067817.2	7.21497	0.605955	-4.63493	-2.85127	3.57e-06	4.74e-05	DOWN
AC007991.4	2.59852	0.830329	2.52256	2.13179	0.0116503	0.0421924	UP
AC113133.1	5.64146	0.979977	-4.87553	-4.80002	1.09e-06	1.7e-05	DOWN
AC026904.2	3.70564	0.756698	-2.80765	-2.15219	0.00499046	0.0215239	DOWN
AC022915.2	4.16102	0.608848	-4.25768	-2.65414	2.07e-05	0.000216934	DOWN
LINC02599	7.20727	0.526642	-4.03831	-2.13916	5.38e-05	0.000495819	DOWN
AC044893.1	3.71562	0.925122	-4.80656	-4.45526	1.54e-06	2.3e-05	DOWN
AC064807.2	6.51732	0.63214	2.80142	3.75461	0.00508786	0.0218652	UP
AC022034.3	6.04264	0.558748	-3.67829	-2.06899	0.000234802	0.0017353	DOWN
AC012349.1	7.46559	0.853869	-3.14392	-2.70495	0.00166702	0.00888362	DOWN
LINC00968	141.558	0.629466	-5.88906	-3.71061	3.88e-09	1.14e-07	DOWN
AC013644.1	1.99276	1.08107	-2.79098	-3.04143	0.00525483	0.0224307	DOWN
LINC01606	17.857	0.750385	4.33417	5.35011	1.46e-05	0.000160875	UP
AC104051.2	4.25809	0.749415	-4.60426	-3.59418	4.14e-06	5.39e-05	DOWN
AC100812.1	13.7732	0.609897	3.70006	2.26338	0.000215547	0.00161068	UP
AC084082.1	3.38715	0.915609	-3.22865	-3.04778	0.00124377	0.00697053	DOWN
AC079089.1	10.4588	0.830888	2.7817	3.19671	0.00540743	0.0229349	UP
STAU2-AS1	28.439	0.548955	4.69999	2.58557	2.6e-06	3.62e-05	UP
AC115837.2	6.27358	1.01228	-4.07186	-4.1588	4.66e-05	0.000438165	DOWN
ZFHX4-AS1	37.1111	0.548643	-4.27526	-2.3486	1.91e-05	0.000202282	DOWN
AC062004.1	25.2809	0.622161	-6.52908	-4.11817	6.62e-11	2.83e-09	DOWN
AC068700.1	14.0092	0.59584	-3.7366	-2.23521	0.000186524	0.00142754	DOWN
AC009686.2	14.5825	0.375463	2.80067	2.06946	0.00509973	0.0219081	UP
AC011773.1	2.80951	0.744562	3.73533	2.86408	0.000187467	0.00143297	UP
AC100801.1	11.9527	0.897894	-3.28804	-2.96573	0.00100887	0.00584983	DOWN
AC104211.2	14.7017	0.849931	-4.34994	-3.75725	1.36e-05	0.000151297	DOWN
AC108860.2	133.127	0.439718	4.65128	2.04569	3.3e-06	4.45e-05	UP
AC068189.1	4.40456	0.76037	2.66358	2.03942	0.00773145	0.0305029	UP
AP003548.1	15.9299	0.893624	-5.34926	-5.00242	8.83e-08	1.89e-06	DOWN
AP001574.1	30.3454	0.716296	4.79404	3.45316	1.63e-06	2.42e-05	UP
AP003472.1	11.2393	0.728534	4.04126	2.97041	5.32e-05	0.000490602	UP
AP000424.1	2.11731	0.856298	2.57287	2.22229	0.010086	0.0376794	UP
AP001207.3	110.579	0.611856	3.33918	2.04356	0.000840263	0.00503397	UP
AC012213.4	11.0933	1.01427	5.45054	5.57962	5.02e-08	1.14e-06	UP
AC012213.1	16.6956	0.841918	5.50108	4.8258	3.77e-08	8.77e-07	UP
AC021546.1	3.87775	0.780206	-2.79984	-2.20288	0.00511275	0.0219576	DOWN
AC027031.2	161.986	0.403236	5.14325	2.07429	2.7e-07	5.02e-06	UP
AC079061.1	7.72481	0.77758	-4.15988	-3.30636	3.18e-05	0.000316905	DOWN
LINC02237	33.9739	0.836747	-6.60979	-5.75955	3.85e-11	1.74e-09	DOWN
LINC00536	26.286	0.645333	4.64469	3.00805	3.41e-06	4.57e-05	UP
CASC8	297.362	0.611608	4.13013	2.52632	3.63e-05	0.000354288	UP
AF230666.2	3.38317	0.686128	2.92788	2.02835	0.00341283	0.0158937	UP
AC011676.2	2.0243	0.964465	2.77978	2.68997	0.00543964	0.0230521	UP
AC100803.1	10.2205	0.601826	3.48175	2.10203	0.000498144	0.00325972	UP
AC083841.1	15.2755	0.776134	3.77667	2.95069	0.00015894	0.00124888	UP
RHPN1-AS1	252.138	0.354709	6.52786	2.31581	6.67e-11	2.85e-09	UP
AC105118.1	12.5816	0.767257	5.22261	4.11483	1.76e-07	3.45e-06	UP
MAFA-AS1	7.82177	0.918557	5.10053	4.75793	3.39e-07	6.15e-06	UP
AC067930.4	4.24388	0.717214	3.56039	2.59757	0.000370299	0.00254417	UP
AC105219.3	1.42376	1.09759	2.73526	3.02764	0.00623316	0.0256771	UP
AC105219.2	5.90825	0.820991	5.15481	4.36317	2.54e-07	4.75e-06	UP
AC109322.1	140.786	0.377126	5.97925	2.25534	2.24e-09	6.87e-08	UP
PGM5P3-AS1	12.9571	0.780491	-6.43139	-5.25855	1.26e-10	5.11e-09	DOWN
LINC01230	224.421	0.958336	-3.70079	-3.71409	0.00021493	0.00160718	DOWN
GLIS3-AS1	15.4159	0.886867	4.15057	3.72858	3.32e-05	0.000328353	UP
AL162411.1	48.4029	0.894866	2.99928	2.68255	0.00270617	0.0131548	UP
AL354707.1	203.586	0.439456	5.64742	2.48242	1.63e-08	4.14e-07	UP
AL591222.1	7.69823	0.890984	3.14217	2.82125	0.00167699	0.0089294	UP
CDKN2A-DT	6.62741	0.716885	3.81587	2.76653	0.000135706	0.00109071	UP
CDKN2B-AS1	41.537	0.632041	3.31848	2.09894	0.000905102	0.00535573	UP
AL449423.1	1.46517	0.920768	2.59803	2.42816	0.00937593	0.0355526	UP
PTENP1-AS	4.12997	0.849992	-5.15232	-4.3776	2.57e-07	4.8e-06	DOWN
AL356489.2	68.5611	0.551222	-7.63786	-4.22951	2.21e-14	1.87e-12	DOWN
PGM5-AS1	34.7161	0.636315	-8.69958	-5.90873	3.33e-18	5.1e-16	DOWN
AL161457.1	3.71135	0.903079	-3.2871	-3.01282	0.00101225	0.00586523	DOWN
LINC01474	5.55763	0.805041	-4.68899	-3.94208	2.75e-06	3.79e-05	DOWN
AL513318.2	10.7873	0.632846	-3.44397	-2.18806	0.000573249	0.00365861	DOWN
LINC01508	66.3442	0.665083	4.90204	3.26609	9.48e-07	1.52e-05	UP
LINC01501	10.0957	1.20748	3.25826	3.65474	0.00112097	0.00639543	UP
AL158071.4	2.12499	0.808318	-3.51883	-2.90805	0.000433459	0.00290164	DOWN
AL158071.1	12.2153	0.770196	-2.84134	-2.19089	0.00449239	0.0197714	DOWN
LINC00484	14.121	0.729566	-2.89187	-2.11352	0.0038296	0.0173813	DOWN
BARX1-DT	19.2918	1.24398	2.79491	2.43711	0.00519148	0.0222219	UP
AL136084.3	40.9216	0.511569	-4.61103	-2.36034	4.01e-06	5.25e-05	DOWN
TMEM246-AS1	1.70493	1.14319	-2.56532	-2.97114	0.0103081	0.0383267	DOWN
LINC01505	40.6118	0.886486	4.91312	4.38638	8.96e-07	1.45e-05	UP
AL355601.1	1.70692	1.00496	-2.94137	-2.95288	0.00326765	0.0153532	DOWN
AL137024.1	1.52779	0.900619	-3.41769	-3.07404	0.000631556	0.00397501	DOWN
AL162426.1	6.10542	0.578389	-3.93878	-2.30036	8.19e-05	0.000708233	DOWN
AL161785.1	57.2321	0.362572	-6.73493	-2.44391	1.64e-11	7.97e-10	DOWN
AL353611.1	1.52585	0.92946	-2.79885	-2.59629	0.00512844	0.0220133	DOWN
AL590226.1	18.0621	0.472218	-4.87733	-2.30808	1.08e-06	1.69e-05	DOWN
AL954642.1	3.03803	0.856909	-3.72179	-3.26237	0.000197818	0.00149898	DOWN
AC068580.2	2.22762	0.932819	2.45337	2.33969	0.0141524	0.0492348	UP
MRPL23-AS1	2.21194	0.780099	-2.80619	-2.23825	0.00501312	0.0216014	DOWN
IGF2-AS	11.0244	0.597922	-5.19698	-3.14501	2.03e-07	3.9e-06	DOWN
AC127526.2	5.49171	0.744371	-4.09443	-3.12745	4.23e-05	0.00040451	DOWN
AC104237.3	5.42555	0.886768	-3.91572	-3.53088	9.01e-05	0.000769199	DOWN
AC044810.2	14.6736	0.784288	-3.10155	-2.43536	0.00192512	0.0100002	DOWN
RIC3-DT	4.24825	1.09671	2.6606	4.30679	0.0078002	0.0307124	UP
AC111188.1	10.9634	0.757583	2.89826	2.20228	0.0037524	0.0171255	UP
AC099687.1	2.98223	1.03987	-3.72453	-3.8969	0.000195682	0.00148523	DOWN
LINC01616	1.47454	0.98711	-2.87151	-2.83195	0.00408521	0.0183135	DOWN
PAUPAR	2.22926	1.08246	3.26066	3.56474	0.00111154	0.00635373	UP
WT1-AS	24.6778	0.846609	5.3118	4.59599	1.09e-07	2.25e-06	UP
AC113192.2	2.88969	0.801745	3.02193	2.47935	0.00251167	0.0123863	UP
AC087521.1	30.8951	0.598185	-5.42956	-3.25996	5.65e-08	1.27e-06	DOWN
AP003721.1	6.9337	0.777837	3.67397	2.89715	0.000238815	0.00176133	UP
AP003721.2	5.89346	0.884128	3.8853	3.5292	0.000102205	0.00085504	UP
AP001453.2	59.897	0.498618	6.03166	3.01127	1.62e-09	5.19e-08	UP
C11orf72	6.96335	0.649246	3.13816	2.04466	0.00170012	0.00903534	UP
AP000808.1	51.7835	0.455487	-4.86586	-2.21778	1.14e-06	1.77e-05	DOWN
AP003071.4	49.284	0.61302	-5.318	-3.26747	1.05e-07	2.19e-06	DOWN
AP003071.3	2.14698	0.90273	-3.83125	-3.45338	0.000127494	0.00103422	DOWN
MRGPRF-AS1	7.41534	0.793265	-5.53877	-4.58888	3.05e-08	7.22e-07	DOWN
AP000439.2	10.9481	0.84246	-5.03559	-4.4421	4.76e-07	8.26e-06	DOWN
AP003555.3	11.9946	0.752909	-4.71994	-3.61947	2.36e-06	3.32e-05	DOWN
AP003555.1	1.07783	0.980982	-2.5857	-2.53664	0.00971826	0.0366017	DOWN
LINC02584	5.55103	0.861548	-2.91435	-2.5389	0.0035643	0.0164482	DOWN
SHANK2-AS3	1.65278	1.11216	2.49754	2.7899	0.0125058	0.0446304	UP
LINC01537	90.7125	0.518494	-10.0504	-5.26585	9.15e-24	3.22e-21	DOWN
AP000785.1	2.69192	0.858569	-3.22218	-2.84812	0.0012722	0.00710401	DOWN
AP001189.6	1.43938	0.88553	-2.45725	-2.19068	0.0140007	0.0488384	DOWN
AP001189.3	37.6549	0.555781	-3.93296	-2.18835	8.39e-05	0.000721767	DOWN
AP001189.1	42.3865	0.623824	-4.41971	-2.76132	9.88e-06	0.000114798	DOWN
AP003110.1	3.05787	0.782347	-2.67526	-2.12403	0.00746721	0.0296615	DOWN
AP002957.1	2.7282	0.961844	2.68709	2.65741	0.00720786	0.0288037	UP
AP000654.1	1.64586	0.928547	-2.55426	-2.39614	0.0106415	0.039296	DOWN
AP001528.2	220.124	0.456802	-9.57057	-4.37869	1.06e-21	2.81e-19	DOWN
AP000924.1	4.17124	0.724867	3.38878	2.49947	0.000702053	0.00433185	UP
AP003973.2	3.14748	0.761136	-2.87469	-2.21971	0.00404421	0.018175	DOWN
AP002840.2	65.2921	0.4255	-4.80123	-2.04398	1.58e-06	2.35e-05	DOWN
AP002518.1	2.81003	0.902423	-2.71932	-2.51066	0.00654165	0.0267035	DOWN
AP000941.1	22.4405	0.575392	-3.78867	-2.18418	0.000151455	0.00119852	DOWN
USP2-AS1	55.7189	0.396134	6.72737	2.66757	1.73e-11	8.36e-10	UP
AP001360.2	5.28824	0.890798	-4.76702	-4.28538	1.87e-06	2.73e-05	DOWN
AP000842.3	5.39401	0.80251	3.94936	3.2603	7.84e-05	0.000682401	UP
AP000821.1	3.46673	0.979132	-4.01376	-3.94749	5.98e-05	0.000541262	DOWN
KIRREL3-AS1	107.804	0.750056	5.3165	3.99068	1.06e-07	2.2e-06	UP
AP001783.1	127.148	0.703699	6.6081	4.66277	3.89e-11	1.76e-09	UP
AP003481.1	10.0748	0.8474	-3.67516	-3.14735	0.0002377	0.00175391	DOWN
AP000904.1	3.70391	0.822033	2.51143	2.08028	0.0120245	0.0432938	UP
AP000844.2	12.3918	0.927946	-4.98461	-4.67809	6.21e-07	1.05e-05	DOWN
AP004608.1	116.639	0.787312	-4.92024	-3.87433	8.64e-07	1.4e-05	DOWN
IDI2-AS1	11.2563	0.49725	4.3718	2.18215	1.23e-05	0.000138938	UP
LINC02669	7.15053	0.9226	4.64838	4.45207	3.35e-06	4.5e-05	UP
LINC02660	12.9568	0.827418	-3.31161	-2.75698	0.000927619	0.00546994	DOWN
LINC00702	321.395	0.671856	-4.15711	-2.79312	3.22e-05	0.000320371	DOWN
AL355303.1	1.16857	0.964608	2.80362	2.69558	0.00505327	0.0217368	UP
LINC02561	14.3074	0.681141	4.2179	2.88972	2.47e-05	0.000253855	UP
LINC02657	12.1824	0.705198	4.13277	2.93595	3.58e-05	0.000350891	UP
PRKCQ-AS1	285.59	0.631524	3.22397	2.03611	0.00126428	0.00706712	UP
LINP1	160.822	1.08397	3.13012	3.34979	0.00174735	0.00924616	UP
LINC00706	3.8776	1.14859	3.05597	3.55134	0.00224333	0.0113256	UP
LINC00707	848.279	0.978803	5.58293	5.40155	2.37e-08	5.78e-07	UP
AC044784.1	1.44505	0.931616	-3.19213	-2.97284	0.0014123	0.00774848	DOWN
LINC00710	1.75446	0.958147	-3.63447	-3.48444	0.000278551	0.00200366	DOWN
AL607028.1	5.45674	0.670273	3.04792	2.05709	0.00230432	0.0115509	UP
AL133415.1	19.3126	0.566473	-4.08753	-2.31993	4.36e-05	0.000414326	DOWN
ST8SIA6-AS1	291.215	0.825927	4.67355	3.85704	2.96e-06	4.05e-05	UP
AL359697.1	16.2453	0.652041	3.30358	2.15754	0.000954574	0.00559115	UP
MKX-AS1	2.47255	0.999874	-3.09292	-3.10664	0.00198197	0.0102478	DOWN
AL157387.1	192.617	0.811049	-8.82524	-7.51713	1.09e-18	1.86e-16	DOWN
LINC00839	381.494	0.481575	4.92737	2.37315	8.33e-07	1.36e-05	UP
LINC01518	2.91371	1.07799	2.93595	3.12322	0.00332527	0.0155561	UP
LINC02623	3.79174	0.956584	-2.54525	-2.4016	0.0109198	0.040122	DOWN
AL137026.1	24.8154	0.595426	-3.4464	-2.05463	0.000568113	0.00363085	DOWN
AL353801.3	5.00386	0.697779	3.12588	2.19905	0.00177272	0.00935744	UP
AL358394.2	4.09438	0.917933	3.51258	3.30417	0.000443772	0.00295537	UP
AL358394.1	15.3042	0.784419	4.59395	3.6459	4.35e-06	5.61e-05	UP
AC245041.2	80.1236	0.795987	3.05344	2.43151	0.00226232	0.0113989	UP
AC245041.1	58.5507	0.960902	2.61052	2.50664	0.00904045	0.0345113	UP
LNCAROD	7.81012	0.834054	2.82384	2.37319	0.00474527	0.0206733	UP
TMEM26-AS1	7.364	0.718265	-3.15383	-2.27835	0.00161144	0.00863587	DOWN
KCNMA1-AS3	3.52813	0.955778	-3.79489	-3.65189	0.000147712	0.00117326	DOWN
LINC02679	1.67404	0.771937	-2.5678	-2.02957	0.0102346	0.0381201	DOWN
AL132656.3	1.52058	0.820599	-2.93254	-2.45197	0.00336203	0.0157054	DOWN
AL136982.1	24.3586	0.82423	-2.57294	-2.12528	0.0100839	0.0376794	DOWN
ACTA2-AS1	499.428	0.60052	-4.96714	-2.98305	6.79e-07	1.13e-05	DOWN
AL157400.2	2.15278	0.831697	2.65743	2.24504	0.00787385	0.0309459	UP
DNMBP-AS1	27.8938	0.696616	-3.0981	-2.16234	0.00194763	0.0100993	DOWN
AL133215.2	24.1446	0.448155	4.71682	2.1164	2.4e-06	3.36e-05	UP
TLX1NB	14.4898	1.21889	3.58005	4.17379	0.000343526	0.00238403	UP
AL133387.1	2.45041	1.09528	-3.19237	-3.53656	0.00141108	0.00774311	DOWN
AL121929.2	51.4985	0.74339	2.85597	2.12426	0.00429055	0.019023	UP
SH3PXD2A-AS1	49.1982	0.654619	3.50288	2.2948	0.000460252	0.00305067	UP
CFAP58-DT	29.0586	0.489369	5.08346	2.49193	3.71e-07	6.66e-06	UP
ADD3-AS1	26.1479	0.470375	-6.65056	-3.1433	2.92e-11	1.35e-09	DOWN
AL355512.1	2.75023	0.754344	-2.6886	-2.05692	0.00717525	0.0287028	DOWN
AC005383.1	5.60889	0.66972	-3.90979	-2.65076	9.24e-05	0.000785213	DOWN
AL731557.1	1.87872	0.925789	-3.88662	-3.5935	0.000101648	0.000851481	DOWN
EMX2OS	387.713	0.548243	-5.65357	-3.10013	1.57e-08	4.01e-07	DOWN
LINC01561	7.36155	0.828738	4.75027	4.1091	2.03e-06	2.92e-05	UP
TCERG1L-AS1	2.09682	0.98437	-3.34246	-3.29597	0.000830408	0.00498492	DOWN
C10orf91	27.0026	0.638015	5.08385	3.25721	3.7e-07	6.66e-06	UP
AC026369.3	5.86368	0.721832	2.7841	2.01883	0.00536759	0.0228096	UP
AC026369.1	17.6522	0.738115	-2.94204	-2.17523	0.00326056	0.0153288	DOWN
CCND2-AS1	3.50169	0.696533	-3.41505	-2.42427	0.00063771	0.00400439	DOWN
AC006206.2	2.26398	0.844057	2.9425	2.07342	0.00325574	0.0153173	UP
AC092490.1	18.5182	0.719387	-4.00684	-2.89492	6.15e-05	0.000555501	DOWN
AC008115.2	1.27738	0.858212	2.5942	2.2532	0.00948125	0.0358847	UP
LINC01559	4.00316	0.926565	2.94767	2.78404	0.00320176	0.0151164	UP
AC092112.1	10.6708	0.893706	3.49407	3.14571	0.000475724	0.00313906	UP
AC024901.1	7.36105	0.789782	3.07494	2.44761	0.00210547	0.0107692	UP
AC010185.1	7.25659	0.681965	-3.55807	-2.4473	0.00037359	0.00256242	DOWN
AC008250.2	1.26044	0.989864	-3.03867	-3.00457	0.00237624	0.0118376	DOWN
AC087318.1	1.84263	1.0309	2.99055	3.08353	0.00278473	0.0134659	UP
AC053513.1	3.49637	0.77393	3.55934	5.04419	0.000371781	0.00255272	UP
AC023796.2	1.88376	0.999383	3.21615	3.21413	0.00129922	0.00723241	UP
AC026310.2	1.92904	1.03263	2.76906	2.9073	0.00562176	0.0236812	UP
AC022081.1	2.93471	1.10765	-3.00629	-3.36053	0.00264461	0.0129119	DOWN
AC009320.1	3.32389	0.827355	-3.62284	-3.07241	0.00029139	0.00207605	DOWN
DDX11-AS1	72.614	0.420971	6.04236	2.54558	1.52e-09	4.92e-08	UP
AC079630.1	31.7828	0.596093	-3.42974	-2.04544	0.00060415	0.00382487	DOWN
LINC02416	5.66852	0.705794	4.67669	3.41272	2.92e-06	4e-05	UP
AC008147.2	39.9945	0.571992	-4.93586	-2.82916	7.98e-07	1.31e-05	DOWN
AC068987.3	3.24832	0.767379	-3.94967	-3.11515	7.83e-05	0.000681883	DOWN
AC068987.1	2.86091	0.790967	-4.06081	-3.2923	4.89e-05	0.000456235	DOWN
AC025259.3	112.38	0.526012	-4.46104	-2.34762	8.16e-06	9.72e-05	DOWN
LINC00592	13.4488	0.584202	3.63318	2.12896	0.000279954	0.00201151	UP
HOTAIR	188.427	0.653765	3.61948	2.36649	0.000295198	0.00209819	UP
HOXC-AS3	23.5099	0.698081	2.96659	2.07254	0.00301117	0.014361	UP
AC012531.2	1.43133	0.872278	-2.48933	-2.19387	0.0127983	0.0454734	DOWN
AC023794.2	15.7402	0.68529	-3.0169	-2.0694	0.00255374	0.0125536	DOWN
AC026124.1	4.23896	0.764344	-2.89396	-2.23093	0.0038042	0.0172887	DOWN
AC025419.1	3.80745	0.712321	-4.0065	-2.94434	6.16e-05	0.000556138	DOWN
LINC02454	3.13614	0.841849	-2.59827	-2.20527	0.00936955	0.0355326	DOWN
LINC02408	3.75398	0.88598	3.72261	3.3959	0.000197173	0.00149444	UP
IFNG-AS1	26.3049	0.763523	2.74201	2.09407	0.00610641	0.0252747	UP
TRHDE-AS1	1015.77	0.788886	-7.94574	-6.26328	1.93e-15	2e-13	DOWN
AC090015.1	2.27979	1.06286	3.39867	3.64094	0.000677146	0.00420142	UP
AC073525.1	5.35768	0.995276	-4.02709	-4.03953	5.65e-05	0.000514948	DOWN
AC024909.1	63.7506	0.680675	-3.28851	-2.23914	0.00100719	0.00584428	DOWN
AC126175.1	1.50838	1.03889	-2.66479	-2.77147	0.00770354	0.0304135	DOWN
AC138123.1	4.3745	0.627228	-3.61749	-2.29788	0.000297478	0.00211254	DOWN
AC124947.1	14.8946	0.531775	-5.17936	-2.76939	2.23e-07	4.24e-06	DOWN
SOCS2-AS1	199.416	0.535338	-5.9938	-3.21068	2.05e-09	6.34e-08	DOWN
AC012085.2	8.54883	0.691187	-3.57624	-2.48926	0.000348575	0.00241492	DOWN
TMPO-AS1	143.33	0.397807	6.61054	2.63082	3.83e-11	1.73e-09	UP
AC007637.1	27.5124	0.567366	-4.67629	-2.66144	2.92e-06	4e-05	DOWN
AC125603.2	6.60165	0.783791	-4.66049	-3.80463	3.15e-06	4.28e-05	DOWN
AC026367.2	12.568	0.515296	-4.02727	-2.08111	5.64e-05	0.000514692	DOWN
AC084880.3	2.3553	1.12221	-2.72678	-3.09425	0.00639564	0.0262334	DOWN
AC002563.1	1.68864	0.983977	2.82696	2.80271	0.00469917	0.0204973	UP
AC026333.3	3.48576	0.761403	-3.41245	-2.666	0.000643813	0.00403625	DOWN
AC007368.1	2.4901	1.03085	-2.602	-2.69127	0.0092683	0.0352189	DOWN
FZD10-AS1	221.643	0.604887	-4.32576	-2.6167	1.52e-05	0.000166171	DOWN
LINC00621	3.27911	0.7245	-2.88266	-2.11883	0.00394336	0.017809	DOWN
LINC00398	9.30529	0.595266	-4.98893	-3.00752	6.07e-07	1.03e-05	DOWN
TEX26-AS1	18.5613	0.76679	-3.43644	-2.6428	0.000589417	0.00374479	DOWN
STARD13-AS	17.9695	0.546009	-3.93899	-2.15491	8.18e-05	0.000708159	DOWN
LINC02343	18.0284	0.834827	-3.58275	-3.00604	0.00033999	0.00236355	DOWN
LINC00445	5.88367	0.898293	-5.27847	-4.75041	1.3e-07	2.65e-06	DOWN
LINC01050	4.53443	0.963698	3.37355	3.36844	0.000742049	0.00453964	UP
SMIM2-IT1	1.47829	0.8768	2.70608	2.38835	0.00680835	0.0275556	UP
AL392048.1	5.04825	0.62178	-3.48588	-2.18548	0.000490527	0.0032196	DOWN
LINC00458	3.26092	1.02905	-3.28296	-3.43689	0.00102725	0.00593615	DOWN
LINC00393	192.709	0.960267	4.41682	4.2178	1e-05	0.000116097	UP
LINC00392	1.54994	1.08228	2.45424	6.56057	0.0141183	0.0491399	UP
LMO7DN	9.06034	0.7011	-4.58408	-3.26834	4.56e-06	5.87e-05	DOWN
LMO7DN-IT1	3.18405	0.806164	-3.77056	-3.13348	0.000162879	0.00127456	DOWN
MIR4500HG	10.9929	0.713252	4.90798	3.55651	9.2e-07	1.48e-05	UP
AL445647.1	7.55237	1.06353	3.97355	4.25162	7.08e-05	0.000626428	UP
SOX21-AS1	15.4857	0.869692	3.44456	3.01637	0.000571979	0.00365195	UP
LINC00460	34.604	0.870647	4.87056	4.28448	1.11e-06	1.74e-05	UP
AL161431.1	849.765	1.1442	6.98566	6.46254	2.84e-12	1.61e-10	UP
ARHGEF7-AS2	6.53752	0.8589	-4.34289	-3.83617	1.41e-05	0.000155514	DOWN
LINC01070	22.647	0.88547	-6.6569	-6.03972	2.8e-11	1.3e-09	DOWN
LINC01044	2.24891	0.992942	-3.00483	-2.98011	0.00265726	0.0129507	DOWN
LINC00452	6.30044	0.888099	3.59949	3.26775	0.000318846	0.00223774	UP
LINC00565	56.3494	0.636309	3.19618	2.03455	0.00139261	0.00766749	UP
AL589182.1	30.3296	0.979685	5.2296	5.274	1.7e-07	3.34e-06	UP
AL135999.3	4.79609	0.872528	-2.91953	-2.58124	0.00350556	0.0162165	DOWN
LINC02306	9.26257	0.9562	-2.53921	-2.43287	0.0111104	0.0406699	DOWN
AL079343.1	9.70128	0.758066	-5.8309	-4.66125	5.51e-09	1.56e-07	DOWN
LINC00645	20.0197	1.17107	-3.49472	-4.03711	0.000474551	0.00313323	DOWN
SLC25A21-AS1	103.267	0.355933	-5.67038	-2.01897	1.42e-08	3.66e-07	DOWN
AL121790.2	4.22552	0.886762	-2.87343	-2.59782	0.00406041	0.0182327	DOWN
AL121790.1	27.6294	0.729327	-4.87044	-3.56944	1.11e-06	1.74e-05	DOWN
LINC00517	11.5684	0.473069	-5.03803	-2.39448	4.7e-07	8.18e-06	DOWN
AL392023.2	2.32818	0.861016	-3.87212	-3.33865	0.000107895	0.000895227	DOWN
LINC00639	101.447	0.519393	-4.61115	-2.39624	4e-06	5.25e-05	DOWN
AL161752.1	2.03358	0.944558	-2.73522	-2.59554	0.0062338	0.0256771	DOWN
LINC02303	23.9313	1.12761	-3.8047	-4.2222	0.000141978	0.00113407	DOWN
LINC00871	3.00946	1.04374	3.49374	3.66332	0.000476302	0.00314119	UP
LINC00648	10.6763	0.779858	-3.81018	-3.00557	0.000138867	0.00111137	DOWN
AL110505.1	1.87656	1.11911	2.51478	5.2993	0.0119106	0.0429522	UP
AL591767.1	1.07358	0.986988	-2.54295	-2.50857	0.0109922	0.0403408	DOWN
AL358334.3	2.50597	0.884383	-2.46776	-2.22788	0.013596	0.0477565	DOWN
LINC00640	20.4466	0.53771	-6.03087	-3.26444	1.63e-09	5.21e-08	DOWN
AL358332.1	4.99878	0.830274	-3.59563	-3.06724	0.000323608	0.00226574	DOWN
LINC02331	1.63783	1.02796	-3.15755	-3.25686	0.00159103	0.00854488	DOWN
AL138995.1	10.9281	0.529421	-4.73809	-2.52308	2.16e-06	3.08e-05	DOWN
AL355073.1	2.15909	0.883844	-3.9507	-3.48659	7.79e-05	0.000679698	DOWN
AL049838.1	48.0661	0.331353	-6.64284	-2.20293	3.08e-11	1.42e-09	DOWN
AL049874.3	2.33733	0.809173	-2.61075	-2.13683	0.00903427	0.0344999	DOWN
AL355916.2	9.72251	0.4872	-4.14902	-2.02813	3.34e-05	0.000330292	DOWN
AL391261.4	2.8145	0.730117	-2.86305	-2.12366	0.00419587	0.0186878	DOWN
AL133370.1	86.3476	0.873886	-3.07514	-2.68575	0.00210406	0.0107637	DOWN
AL133445.2	3.42312	0.639745	-3.98009	-2.61545	6.89e-05	0.000611283	DOWN
AC005225.2	17.0381	0.645731	-4.1785	-2.70957	2.93e-05	0.000294767	DOWN
TGFB3-AS1	3.16359	0.710153	-3.37861	-2.45452	0.000728536	0.00447674	DOWN
LINC01629	10.1687	0.887007	-3.93211	-3.55365	8.42e-05	0.000723747	DOWN
LINC02308	5.55378	0.709571	-3.72729	-2.68447	0.000193551	0.00147245	DOWN
LINC02301	1.3638	1.02489	-2.58508	-2.65134	0.00973574	0.0366547	DOWN
AL049775.1	15.5908	0.559854	-6.23616	-3.53545	4.48e-10	1.63e-08	DOWN
AL096869.2	3.58974	0.723943	-3.29531	-2.43183	0.000983149	0.00572398	DOWN
LINC02321	10.3549	0.550478	5.79788	3.23743	6.72e-09	1.87e-07	UP
FAM181A-AS1	1.4741	0.905501	-3.31874	-2.99983	0.000904258	0.00535171	DOWN
AL132642.1	3.15118	0.747587	-3.2794	-2.49844	0.00104027	0.00600283	DOWN
LINC02292	3.29767	0.857265	-2.91172	-2.53485	0.00359441	0.0165541	DOWN
AL355102.1	1.96226	0.867174	-2.60794	-2.28985	0.00910886	0.0347396	DOWN
MEG3	1664.93	0.47986	-6.95902	-3.33949	3.43e-12	1.93e-10	DOWN
AL117190.1	5.73669	0.737385	-3.78331	-2.837	0.000154759	0.00122078	DOWN
MEG8	6.7759	0.607884	-4.96683	-3.08432	6.81e-07	1.14e-05	DOWN
MEG9	13.0959	0.609394	-4.62231	-2.83546	3.79e-06	5.01e-05	DOWN
DIO3OS	122.301	0.686691	-3.6573	-2.51199	0.000254882	0.00185612	DOWN
LINC02323	11.6804	0.78739	3.24899	2.56666	0.00115814	0.00657039	UP
LINC00605	14.0815	0.737288	2.78476	4.09219	0.00535674	0.0227731	UP
AC012414.5	6.1118	0.63347	-3.8996	-2.49499	9.64e-05	0.0008145	DOWN
AC126407.1	5.18395	0.977637	2.8126	2.78764	0.00491429	0.0212606	UP
PWRN1	3.7684	1.05683	-2.92625	-3.08236	0.0034307	0.0159501	DOWN
AC124312.2	13.6375	0.689674	-3.06766	-2.1211	0.0021574	0.010981	DOWN
AC124312.3	19.1588	0.636763	-3.1702	-2.02188	0.00152334	0.00823743	DOWN
AC026150.3	2.58185	0.699098	-3.26763	-2.33619	0.00108451	0.00621816	DOWN
AC091057.1	348.67	0.405633	6.30803	2.55913	2.83e-10	1.07e-08	UP
AC012236.1	54.3854	0.680201	3.95511	2.69326	7.65e-05	0.00066925	UP
AC037198.2	43.8373	0.542727	-5.71796	-3.10987	1.08e-08	2.85e-07	DOWN
AC020658.4	2.35652	0.850216	3.53691	3.06202	0.00040484	0.00273898	UP
EHD4-AS1	8.8722	0.55826	-4.60504	-2.59082	4.12e-06	5.37e-05	DOWN
AC091073.1	2.14046	1.05684	3.36128	3.57486	0.000775818	0.0047088	UP
AC025431.1	2.71238	0.922222	-4.04617	-3.73209	5.21e-05	0.000482642	DOWN
AC104574.2	7.49309	0.843171	-5.62467	-4.79471	1.86e-08	4.65e-07	DOWN
AC018618.1	2.95428	0.897664	-3.40577	-3.09032	0.000659782	0.00411899	DOWN
AC103740.2	25.2666	0.657453	3.29472	2.16852	0.0009852	0.00573314	UP
LINC02568	128.272	0.801797	-6.38512	-5.14586	1.71e-10	6.78e-09	DOWN
AC013553.4	3.93659	0.658158	-3.13173	-2.08426	0.00173777	0.00920603	DOWN
LINC02206	1.3771	0.978848	-2.80999	-2.74448	0.00495435	0.0213939	DOWN
AC087482.1	52.5679	0.802015	-7.66985	-6.56501	1.72e-14	1.49e-12	DOWN
EWSAT1	248.166	0.687138	-3.27238	-2.24851	0.00106645	0.00612874	DOWN
DRAIC	61.005	0.682519	-4.50038	-3.07693	6.78e-06	8.28e-05	DOWN
AC100826.1	3.0748	0.968132	-3.90533	-3.78718	9.41e-05	0.00079856	DOWN
AC010931.2	15.996	0.501781	-4.54726	-2.28698	5.43e-06	6.81e-05	DOWN
AC090826.1	6.7473	0.640331	-3.67946	-2.37227	0.000233732	0.00172858	DOWN
AC105020.2	1.59339	0.813192	-2.66065	-2.21552	0.00779902	0.0307115	DOWN
AC105020.5	9.7777	0.484707	-4.53614	-2.20862	5.73e-06	7.14e-05	DOWN
AC046168.1	50.9484	0.687195	4.4686	3.07542	7.87e-06	9.43e-05	UP
AC027228.2	62.2532	0.417731	6.65983	2.7849	2.74e-11	1.28e-09	UP
AC011944.1	6.2955	0.539681	2.4777	3.13761	0.0132234	0.0467168	UP
AC016705.2	241.477	0.665337	3.08972	2.05576	0.00200345	0.010339	UP
AC048382.5	19.2738	0.487877	-4.77779	-2.33672	1.77e-06	2.6e-05	DOWN
AC021739.2	37.7838	0.378427	-7.65676	-2.90485	1.91e-14	1.63e-12	DOWN
LINC01586	8.52074	0.82686	-3.69531	-3.09287	0.000219622	0.0016381	DOWN
AC103982.1	5.93452	1.14377	3.36408	4.87058	0.000767998	0.00467275	UP
AC079075.1	3.68893	0.778328	-2.69512	-2.12434	0.0070364	0.0282628	DOWN
LINC01197	135.223	0.489184	-6.6524	-3.25643	2.88e-11	1.34e-09	DOWN
AC104260.1	2.89649	0.841341	-3.72289	-3.18202	0.000196959	0.00149317	DOWN
LINC00924	95.2308	0.52758	-5.87211	-3.10087	4.3e-09	1.24e-07	DOWN
AC027013.1	1.50145	0.934715	-3.11635	-2.90248	0.00183103	0.00960873	DOWN
AC024337.1	5.1408	0.682945	3.37559	2.32884	0.000736567	0.00451551	UP
LINC02254	2.59096	0.793015	-3.37854	-2.73706	0.000728714	0.00447674	DOWN
AC015660.1	6.73256	0.946814	3.10362	2.95593	0.00191166	0.00994951	UP
CERS3-AS1	8.11579	0.502285	-5.37994	-2.7359	7.45e-08	1.62e-06	DOWN
Z97653.1	6.51844	0.679505	-3.0757	-2.09916	0.00210012	0.0107504	DOWN
LMF1-AS1	11.3373	0.507452	-4.7198	-2.40601	2.36e-06	3.32e-05	DOWN
AC120498.6	1.39193	1.04516	-2.87922	-3.01704	0.0039866	0.0179611	DOWN
AC120498.10	1.66627	0.940114	-2.87004	-2.69133	0.00410419	0.0183756	DOWN
AC120498.4	10.9293	0.79763	-3.72144	-2.99514	0.000198091	0.0015007	DOWN
AL032819.1	2.25225	0.870531	2.79598	2.44144	0.00517431	0.0221664	UP
AL031710.2	4.94653	0.679214	3.51773	2.41284	0.000435263	0.0029107	UP
AL031710.1	13.3163	0.81435	-5.05137	-4.24872	4.39e-07	7.71e-06	DOWN
AC004233.3	3.29914	0.734228	3.06939	2.28569	0.00214495	0.0109331	UP
AC004233.1	7.91812	0.675417	3.84686	2.61738	0.000119643	0.000978884	UP
AC004233.2	174.884	0.513674	4.0485	2.07983	5.15e-05	0.000478683	UP
AJ003147.2	2.32023	1.10242	3.16857	3.53254	0.0015319	0.00827544	UP
AC005736.1	19.6013	0.532868	-4.11747	-2.19794	3.83e-05	0.000371967	DOWN
AC007014.2	5.7798	0.506364	4.2148	2.15089	2.5e-05	0.000257129	UP
AC009121.1	7.14194	0.645336	4.09904	2.67687	4.15e-05	0.000397716	UP
LINC02185	23.9803	0.5839	-7.25772	-4.31691	3.94e-13	2.68e-11	DOWN
LINC02130	1.65457	0.986313	-3.36768	-3.31998	0.000758042	0.00462	DOWN
AC040173.1	1.32487	0.934968	-2.99684	-2.79311	0.00272789	0.0132465	DOWN
AF001548.1	8.68069	0.776537	-3.70312	-2.9021	0.000212961	0.00159467	DOWN
AC130456.3	5.5376	0.913767	-5.04181	-4.61197	4.61e-07	8.06e-06	DOWN
AC137056.1	3.79915	0.913144	-4.54917	-4.15605	5.39e-06	6.76e-05	DOWN
AC092375.2	18.671	0.476117	-4.21603	-2.01012	2.49e-05	0.000255897	DOWN
LINC02195	6.84092	0.913863	3.86766	3.65004	0.000109887	0.000909421	UP
AC138904.1	123.308	0.698919	4.81777	3.36801	1.45e-06	2.19e-05	UP
ATP2A1-AS1	42.769	0.535749	5.11176	2.74205	3.19e-07	5.83e-06	UP
AC027348.1	8.36248	0.669175	-6.07326	-4.30725	1.25e-09	4.13e-08	DOWN
AC007610.1	1.15306	0.947144	2.94381	2.78592	0.00324195	0.0152702	UP
AC007608.3	29.019	0.643232	3.71015	2.38843	0.000207136	0.00155754	UP
LINC02169	7.24769	0.919354	-3.80274	-3.58981	0.000143104	0.00114193	DOWN
AC106738.2	27.2535	0.728069	-4.35072	-3.18316	1.36e-05	0.000150839	DOWN
AC040168.1	10.1082	0.723534	-4.9331	-3.65341	8.09e-07	1.32e-05	DOWN
LINC00922	15.968	0.72362	4.44374	3.23403	8.84e-06	0.000104076	UP
AC025284.1	1.59048	0.840161	-3.32413	-2.78665	0.000886955	0.00526742	DOWN
AC092376.2	75.076	0.330581	-7.55213	-2.49829	4.28e-14	3.43e-12	DOWN
AC084064.1	4.0798	0.710673	-3.83242	-2.79266	0.000126889	0.00103009	DOWN
AC009159.2	1.20442	1.00596	-2.62727	-2.65035	0.00860732	0.0331863	DOWN
AC009159.3	24.3894	0.37041	-5.80982	-2.15525	6.25e-09	1.75e-07	DOWN
AC105411.1	7.99661	0.577423	-3.73509	-2.16825	0.000187645	0.001434	DOWN
AC108097.1	2.18325	1.01358	-2.90046	-2.93724	0.00372612	0.0170369	DOWN
ARLNC1	20.9056	0.700533	2.93783	2.06044	0.00330523	0.0154915	UP
AC092718.4	379.973	0.443511	6.70429	2.97403	2.02e-11	9.68e-10	UP
AC026469.1	9.65581	0.599214	-3.90303	-2.35015	9.5e-05	0.000804737	DOWN
LINC02188	2352.66	0.622787	4.21815	2.62684	2.46e-05	0.000253742	UP
LINC02189	10.9929	0.889449	2.8447	2.5452	0.00444539	0.0196019	UP
AC126696.3	5.7278	0.913084	5.20608	4.77052	1.93e-07	3.73e-06	UP
AC134312.4	1.30514	0.925548	-3.4022	-3.13861	0.000668461	0.00415631	DOWN
AC134312.3	2.20831	1.02244	-3.47824	-3.56227	0.000504716	0.00329405	DOWN
AC134312.1	14.1033	0.736441	-4.20102	-3.11889	2.66e-05	0.000270878	DOWN
AC134312.5	46.4021	0.438083	7.15098	3.13876	8.62e-13	5.48e-11	UP
LINC02182	9.27076	0.791325	2.67356	2.12258	0.00750515	0.0297902	UP
AC092384.3	2.89203	0.794313	-2.72426	-2.20029	0.00644461	0.0263941	DOWN
AC092384.1	7.69679	0.620391	-5.58665	-3.58338	2.31e-08	5.66e-07	DOWN
LINC00304	5.06528	0.650674	-3.77513	-2.48802	0.000159921	0.00125446	DOWN
VPS9D1-AS1	540.27	0.48178	5.28959	2.54862	1.23e-07	2.51e-06	UP
LINC02091	4.63107	0.732309	-4.88498	-3.73734	1.03e-06	1.63e-05	DOWN
AC129507.4	2.09314	1.05993	-2.56835	-2.70784	0.0102184	0.0380773	DOWN
AC129507.1	45.6054	0.556785	-4.95131	-2.76047	7.37e-07	1.22e-05	DOWN
AC087392.2	12.022	0.75159	3.70617	2.80349	0.00021042	0.00157893	UP
MIR22HG	1521.32	0.430137	-5.02566	-2.16176	5.02e-07	8.66e-06	DOWN
AC099684.1	2.5877	0.897301	-3.28835	-2.97656	0.00100778	0.00584641	DOWN
MIR497HG	157.476	0.33826	-7.94173	-2.68744	1.99e-15	2.05e-13	DOWN
AC135178.1	11.6175	0.822193	-7.01166	-5.76943	2.36e-12	1.37e-10	DOWN
AC005725.1	16.2754	0.677336	-4.45253	-3.03756	8.49e-06	0.000100451	DOWN
LINC00670	6.22601	0.964386	-3.97895	-3.89902	6.92e-05	0.000613891	DOWN
AC005863.1	140.556	0.834151	6.88265	5.79291	5.87e-12	3.14e-10	UP
AC025627.1	1.36655	0.90926	-3.19886	-2.90226	0.0013797	0.00761097	DOWN
AC107926.1	3.83792	0.912649	-4.17957	-3.83888	2.92e-05	0.000293564	DOWN
LINC01563	9.24415	0.818828	2.90128	2.39092	0.00371645	0.0170085	UP
ERVE-1	99.8846	0.745115	-3.52805	-2.62955	0.00041863	0.00281989	DOWN
AC061975.6	4.53267	0.969712	4.09102	4.02071	4.29e-05	0.000409293	UP
AC010761.7	1.59132	0.87741	2.74276	2.42089	0.00609248	0.0252395	UP
AC104564.1	1.72896	0.900423	-3.1498	-2.83068	0.0016338	0.00874118	DOWN
AC116407.1	26.5849	0.580844	-4.40865	-2.56525	1.04e-05	0.000120047	DOWN
AC005899.6	14.9689	0.459665	-6.04151	-2.79452	1.53e-09	4.94e-08	DOWN
AC005899.7	8.45378	0.505965	-5.64225	-2.89478	1.68e-08	4.26e-07	DOWN
AC006237.1	2.55334	0.903332	-3.23684	-2.97909	0.00120863	0.00680071	DOWN
AC015849.5	12.0352	0.587939	4.75352	2.81533	2e-06	2.88e-05	UP
AC006441.4	5.20538	0.64456	-4.07711	-2.67051	4.56e-05	0.000430505	DOWN
AC090844.2	53.3641	0.695397	-4.85415	-3.38376	1.21e-06	1.87e-05	DOWN
LINC00974	3.4923	0.964693	-2.93948	-2.8558	0.00328765	0.0154262	DOWN
AC100793.4	31.3025	0.564633	-6.24554	-3.54855	4.22e-10	1.54e-08	DOWN
RAMP2-AS1	287.939	0.548536	-5.26834	-2.89073	1.38e-07	2.78e-06	DOWN
LINC00671	8.00897	0.656524	-5.31858	-3.60294	1.05e-07	2.19e-06	DOWN
MIR2117HG	1.58616	1.0371	-3.06611	-3.18988	0.0021686	0.011031	DOWN
AC005180.2	18.5519	0.798202	-3.6734	-2.94654	0.000239346	0.00176404	DOWN
AC005180.1	15.9996	0.859614	-3.48429	-3.00894	0.000493451	0.00323622	DOWN
MAPT-AS1	7.14586	0.902004	-3.47416	-3.19796	0.000512459	0.00333056	DOWN
MAPT-IT1	3.69634	0.883506	-4.31563	-3.83309	1.59e-05	0.000172813	DOWN
CR936218.2	1.20892	1.00356	-2.90766	-2.91231	0.00364141	0.01673	DOWN
AC068234.3	1.91456	0.789035	-3.06445	-2.48368	0.00218074	0.0110736	DOWN
HOXB-AS1	245.003	0.610766	-5.44734	-3.32826	5.11e-08	1.16e-06	DOWN
HOXB-AS3	19.6077	0.584512	-3.43158	-2.0098	0.000600083	0.00380508	DOWN
HOXB-AS4	10.5971	1.04918	3.9808	4.34039	6.87e-05	0.000609962	UP
AC103702.2	81.6525	0.967945	6.00632	5.938	1.9e-09	5.94e-08	UP
LINC02086	36.6911	0.839503	5.30848	4.51139	1.11e-07	2.28e-06	UP
AC006487.1	3.8306	0.820169	-3.99601	-3.39963	6.44e-05	0.000578777	DOWN
PICART1	12.6715	0.563195	-4.65698	-2.63867	3.21e-06	4.34e-05	DOWN
AC002401.4	1.64187	0.936849	-2.97442	-2.79105	0.00293546	0.0140747	DOWN
AC002401.3	12.2441	0.789131	-4.49301	-3.59923	7.02e-06	8.53e-05	DOWN
AC002401.2	10.1554	0.928425	-4.78286	-4.52769	1.73e-06	2.54e-05	DOWN
AC021491.1	1.3549	0.869366	-2.92901	-2.54098	0.00340041	0.0158404	DOWN
AC005920.3	2.6793	0.766409	2.58277	2.00369	0.00980113	0.0368294	UP
AC099850.3	130.634	0.490675	8.78125	4.32045	1.62e-18	2.63e-16	UP
AC005746.2	3.15052	0.679323	-2.94298	-2.02583	0.00325074	0.0153004	DOWN
TBX2-AS1	39.7893	0.470698	-7.56883	-3.57889	3.77e-14	3.04e-12	DOWN
AC080038.3	11.5051	0.784982	2.71216	2.13424	0.00668463	0.0271672	UP
ABCA9-AS1	2.66542	0.954643	-3.47483	-3.32328	0.000511177	0.00332347	DOWN
AC002546.1	44.6475	0.881965	-5.67045	-5.06562	1.42e-08	3.66e-07	DOWN
LINC01028	21.2197	0.831995	-6.52374	-5.6691	6.86e-11	2.92e-09	DOWN
AC007423.1	49.5499	0.796856	-6.29837	-5.09492	3.01e-10	1.13e-08	DOWN
ROCR	951.088	0.729295	3.12479	2.27851	0.00177932	0.00938308	UP
LINC00511	453.834	0.677777	5.99947	4.06745	1.98e-09	6.15e-08	UP
AC007639.1	4.4524	0.840013	2.88681	2.45595	0.00389165	0.0176168	UP
AC080037.1	9.73131	0.982789	4.53117	4.5895	5.87e-06	7.29e-05	UP
HID1-AS1	25.6047	0.553897	-5.85711	-3.25992	4.71e-09	1.35e-07	DOWN
AC021683.2	62.5318	0.753471	3.55935	2.68254	0.000371769	0.00255272	UP
AC021683.1	55.7271	0.756802	3.81285	2.88752	0.000137372	0.00110138	UP
DNAH17-AS1	18.9236	0.788237	5.32253	4.27322	1.02e-07	2.15e-06	UP
LINC01979	21.2257	0.631752	3.54356	2.24249	0.000394757	0.00268312	UP
AC116025.2	3.94536	0.768696	4.87944	3.85748	1.06e-06	1.68e-05	UP
AC124319.2	13.7098	0.654776	3.47145	2.28162	0.000517651	0.00336016	UP
AC027601.1	123.916	0.755387	3.7344	2.82215	0.000188164	0.00143694	UP
LINC01971	4.56043	0.836906	3.07418	2.6049	0.00211081	0.0107948	UP
AC144831.1	119.97	0.453333	-4.57043	-2.07235	4.87e-06	6.19e-05	DOWN
AC139099.2	4.11055	0.889252	-2.75002	-2.48488	0.00595918	0.0247859	DOWN
AP000915.1	1.23962	0.902762	-3.09686	-2.78852	0.00195581	0.010132	DOWN
TYMSOS	85.804	0.621948	5.02847	3.13106	4.94e-07	8.55e-06	UP
AP005230.1	2.78032	0.852119	3.80414	3.31126	0.000142295	0.00113633	UP
LINC00668	70.4842	0.975381	3.54279	3.44128	0.000395923	0.00268765	UP
AP000897.2	2.10909	0.893791	-3.45731	-3.08859	0.000545603	0.00351417	DOWN
AP001094.2	18.5252	0.558656	-3.7272	-2.08559	0.000193621	0.00147245	DOWN
AP001094.1	1.03878	0.955173	-2.62891	-2.50671	0.00856585	0.0330508	DOWN
AP005271.1	2.1411	0.882126	-2.7135	-2.43589	0.00665765	0.0270847	DOWN
AP005264.1	23.1836	0.621058	-5.25979	-3.28164	1.44e-07	2.9e-06	DOWN
AP005121.1	6.61626	1.03821	-3.94321	-4.10787	8.04e-05	0.000697906	DOWN
AC022809.1	2.05706	1.02084	-3.12409	-3.19732	0.00178358	0.0093994	DOWN
AC091043.1	4.85724	0.900711	5.07505	4.57853	3.87e-07	6.94e-06	UP
AC010754.1	9.22788	0.606255	-6.01911	-3.77033	1.75e-09	5.56e-08	DOWN
AC023983.2	16.7899	0.634612	4.06838	2.5903	4.73e-05	0.000443455	UP
LINC01894	9.04069	0.726492	-3.87359	-2.84384	0.000107244	0.000891429	DOWN
PCAT18	29.0351	0.826791	-3.74706	-3.10636	0.000178923	0.00137905	DOWN
AC110015.1	2.80967	1.06366	3.00947	3.23465	0.00261705	0.0128087	UP
AC007998.3	31.3377	0.463601	-5.78795	-2.68834	7.13e-09	1.97e-07	DOWN
MIR924HG	95.3232	0.435174	6.0577	2.63761	1.38e-09	4.52e-08	UP
SLC14A2-AS1	10.7722	0.705567	-5.56253	-4.06536	2.66e-08	6.41e-07	DOWN
AC021517.1	3.02444	0.900951	-4.3426	-3.91388	1.41e-05	0.000155646	DOWN
AC023421.2	3.27162	0.938197	-3.84157	-3.64661	0.000122251	0.000997529	DOWN
AC023421.1	33.6758	0.683358	-4.56987	-3.12943	4.88e-06	6.21e-05	DOWN
LINC01415	25.8657	0.540863	-4.33808	-2.35043	1.44e-05	0.000158256	DOWN
AC100847.1	8.50104	0.466749	-4.38755	-2.05841	1.15e-05	0.000130527	DOWN
AC110597.1	42.8558	0.537712	-4.9962	-2.69043	5.85e-07	9.94e-06	DOWN
LINC01910	29.7097	0.851573	4.1137	3.51893	3.89e-05	0.000377413	UP
AC018445.1	9.186	0.843891	3.17769	2.70384	0.00148452	0.0080636	UP
PARAL1	55.5014	0.768101	-4.75549	-3.66063	1.98e-06	2.86e-05	DOWN
AL034428.1	1.72678	0.789309	2.57388	2.06611	0.0100566	0.0375957	UP
LINC00851	5.475	1.08525	3.52563	3.86407	0.000422475	0.00284283	UP
AL135936.1	1.76355	1.00721	3.1406	3.17418	0.001686	0.0089685	UP
AL031658.1	8.27693	0.493988	-5.31812	-2.65614	1.05e-07	2.19e-06	DOWN
AL136172.1	2.515	0.736811	3.14517	2.36385	0.00165993	0.00885312	UP
AL031651.2	47.8998	0.557514	4.82037	2.69035	1.43e-06	2.17e-05	UP
AL359555.1	4.7373	0.778435	3.22286	3.9089	0.00126918	0.00708976	UP
AL023803.2	11.7366	0.612559	6.17076	3.87029	6.8e-10	2.39e-08	UP
AL023803.3	1.06935	0.932691	2.85834	2.65586	0.00425864	0.01891	UP
AL021395.1	17.8244	0.901532	-5.69711	-5.33793	1.22e-08	3.18e-07	DOWN
AL118522.1	16.7827	0.718253	-2.78825	-2.00623	0.00529939	0.0225844	DOWN
SLC12A5-AS1	6.81934	0.640623	3.62548	2.33766	0.00028842	0.00206135	UP
AL031055.1	28.28	0.610882	4.01335	2.45556	5.99e-05	0.000542062	UP
LINC01429	2.49484	0.855339	3.63849	3.17586	0.000274238	0.00197747	UP
AL391097.2	3.6624	0.974413	-4.08013	-3.9879	4.5e-05	0.000425821	DOWN
AL133232.1	5.39652	0.938929	2.46322	2.32527	0.0137694	0.0482399	UP
AL354984.2	5.77413	1.2352	-2.53139	-3.08558	0.0113613	0.0414053	DOWN
AL160412.1	3.32948	0.905014	-4.81969	-4.36676	1.44e-06	2.17e-05	DOWN
AL121832.1	10.6332	0.695447	3.24181	2.26263	0.00118773	0.00670999	UP
MIR1-1HG-AS1	8.71056	0.826317	-3.57882	-2.98753	0.000345145	0.00239475	DOWN
AC005330.1	8.2804	0.622439	-3.68559	-2.30461	0.00022817	0.00169443	DOWN
AC004490.1	18.637	0.780005	-4.64971	-3.65817	3.32e-06	4.47e-05	DOWN
LINC01775	6.92728	0.742447	4.17617	3.15257	2.96e-05	0.000297521	UP
AC011444.2	2.44269	0.932262	-3.83064	-3.57423	0.000127811	0.00103627	DOWN
AC010336.5	2.94279	0.938686	3.02474	2.85623	0.00248844	0.0122924	UP
AC011472.4	11.3461	0.518487	-4.71531	-2.45972	2.41e-06	3.38e-05	DOWN
LINC01842	33.7694	0.795803	4.57632	3.65344	4.73e-06	6.04e-05	UP
AC010319.5	8.24493	0.816025	-6.54729	-5.34444	5.86e-11	2.54e-09	DOWN
AC011447.3	56.8627	0.531121	3.778	2.00761	0.000158095	0.00124436	UP
AC123912.4	21.3447	0.679406	-6.76514	-4.75519	1.33e-11	6.63e-10	DOWN
AC024563.1	1.8194	0.839942	-2.70952	-2.32253	0.00673798	0.0273119	DOWN
LINC01224	20.3271	0.752588	3.3021	5.19407	0.00095964	0.00561574	UP
AC011503.1	29.7792	0.649834	-4.8226	-3.14577	1.42e-06	2.14e-05	DOWN
LINC00906	2.28841	0.958202	-3.60964	-3.4632	0.000306628	0.00216657	DOWN
LINC01532	2.04629	0.959423	-3.47772	-3.34103	0.000505695	0.00329645	DOWN
AC025809.1	2.15071	0.863845	-3.65601	-3.1562	0.000256171	0.00186467	DOWN
AC008738.6	1.94763	1.05135	-3.20821	-3.39093	0.00133565	0.00739869	DOWN
HPN-AS1	17.0893	0.423395	5.50917	2.33897	3.61e-08	8.4e-07	UP
AC020907.1	224.56	0.522471	7.50419	3.92404	6.18e-14	4.79e-12	UP
AC002398.2	14.0136	0.801042	-5.17291	-4.25837	2.3e-07	4.36e-06	DOWN
LINC00665	3379.7	0.397716	6.37388	2.53502	1.84e-10	7.26e-09	UP
AC020928.1	40.4782	0.739536	3.58035	2.65074	0.000343137	0.0023827	UP
AC022148.1	29.9812	0.747114	3.82013	2.86238	0.000133383	0.00107418	UP
PCAT19	478.018	0.448638	-4.91121	-2.20347	9.05e-07	1.46e-05	DOWN
AC115522.1	42.4961	0.528835	4.3757	2.31624	1.21e-05	0.000136766	UP
AC006262.1	72.5028	0.763821	3.1638	2.41786	0.00155723	0.00839262	UP
AC008687.3	7.22324	0.795863	-2.99971	-2.40956	0.00270238	0.0131404	DOWN
AC010328.1	4.71109	0.84506	3.05868	2.62117	0.00222313	0.0112559	UP
AC245884.9	80.3943	0.714751	4.07491	2.91464	4.6e-05	0.000433831	UP
AC020922.3	2.38546	0.878681	3.44563	3.06389	0.000569723	0.0036397	UP
AC005498.1	2.4917	0.72502	-3.84155	-2.8757	0.000122261	0.000997529	DOWN
MIMT1	20.9172	0.917599	3.12602	2.8745	0.0017719	0.00935614	UP
AP000527.1	11.3683	1.2012	3.65817	4.38555	0.00025402	0.00185026	UP
LINC01634	14.3676	0.756695	4.52512	3.46737	6.04e-06	7.47e-05	UP
DGCR9	27.4901	0.516748	4.36474	2.25904	1.27e-05	0.000142755	UP
AC007663.2	4.5362	0.704093	-3.98965	-2.88018	6.62e-05	0.000591059	DOWN
AC246793.1	7.62754	0.92198	4.07554	3.88638	4.59e-05	0.000432917	UP
PCAT14	11.2804	0.822937	-4.68838	-3.98008	2.75e-06	3.8e-05	DOWN
AL022324.3	5.58343	0.829939	2.86602	2.40422	0.00415667	0.0185633	UP
AL022329.1	14.0526	0.761516	-5.67875	-4.50704	1.36e-08	3.51e-07	DOWN
Z97353.2	3.38736	0.829545	-2.64297	-2.23002	0.00821814	0.0319418	DOWN
AL020994.3	4.77536	0.957739	-4.52435	-4.34571	6.06e-06	7.49e-05	DOWN
LINC02554	2.05345	0.91729	-3.69281	-3.38537	0.000221792	0.00165314	DOWN
HORMAD2-AS1	8.12523	0.720705	-3.34606	-2.42909	0.000819692	0.00493066	DOWN
AL049747.1	5.22547	0.59671	3.62382	2.17969	0.000290289	0.00207077	UP
AL049749.1	3.00814	1.0706	-2.82475	-3.80704	0.00473179	0.0206257	DOWN
AL031587.1	15.8144	0.785262	3.02841	2.38329	0.00245847	0.012176	UP
AL031587.4	8.82692	1.00681	2.98971	3.02526	0.00279242	0.0134992	UP
LINC01315	384.658	0.682108	3.19947	2.18232	0.0013768	0.00759936	UP
AL022316.1	15.4482	0.406251	5.90316	2.40681	3.57e-09	1.05e-07	UP
LINC01589	20.3522	0.467416	-7.73213	-3.65763	1.06e-14	9.55e-13	DOWN
LINC00898	3.47635	1.08023	2.90697	3.26556	0.0036495	0.0167505	UP
AL117329.1	11.445	0.887847	3.54222	3.16913	0.000396773	0.00269229	UP
FP325330.3	3.94055	1.0617	2.90124	3.19258	0.00371692	0.0170085	UP
U62317.4	13.8305	0.806943	4.18358	3.41415	2.87e-05	0.000289242	UP
U62317.1	389.609	0.702288	7.09272	4.98628	1.32e-12	7.99e-11	UP
CU638689.4	2.98437	1.04688	-2.74884	-2.93475	0.00598068	0.0248626	DOWN
LINC01666	2.45966	0.906588	-2.85035	-2.65396	0.00436715	0.019307	DOWN
AP003900.1	4.09931	1.1307	3.23909	3.70939	0.0011991	0.00676124	UP
AP001439.1	4.84517	0.773973	2.83459	2.21498	0.00458847	0.0200931	UP
LINC00113	6.66512	0.887421	3.8675	3.54125	0.000109955	0.000909751	UP
LINC01697	184.777	0.662589	-8.54132	-5.69342	1.33e-17	1.86e-15	DOWN
GRIK1-AS1	82.4664	0.826131	-4.91045	-2.70629	9.09e-07	1.46e-05	DOWN
AP000251.1	37.5157	0.597323	5.09126	3.04899	3.56e-07	6.43e-06	UP
LINC01426	77.9391	0.68414	3.41617	2.33758	0.000635092	0.00399106	UP
AF015262.1	2.50214	0.780099	2.55012	3.01618	0.0107687	0.0396932	UP
LINC01436	923.538	0.744704	5.55633	4.13562	2.76e-08	6.61e-07	UP
AP000696.1	10.1844	1.02075	3.92022	4.04873	8.85e-05	0.000756357	UP
AP001434.1	6.25655	0.946673	5.02517	4.79594	5.03e-07	8.68e-06	UP
UMODL1-AS1	20.1943	0.837004	3.86953	3.25773	0.000109044	0.000902912	UP
LINC01671	112.23	0.412212	3.17241	3.76646	0.00151178	0.00818453	UP
FRGCA	5.99273	0.952682	3.93919	3.89504	8.18e-05	0.000707775	UP
TSPEAR-AS1	11.7425	0.730525	-3.61571	-2.65393	0.000299529	0.00212524	DOWN
PICSAR	108.166	0.401165	5.38111	2.15948	7.4e-08	1.62e-06	UP
LINC01694	48.7738	0.794705	3.34838	3.08291	0.000812858	0.00489775	UP
AP001476.1	3.34329	0.616468	-3.21798	-2.00958	0.00129097	0.00719514	DOWN

## Sheet: Table S3 DEmiRNAs_TCGA
Table S3 Differentially expressed miRNAs of TNBC samples in the TCGA database
gene	baseMean	lfcSE	stat	log2FoldChange	pvalue	padj	change
hsa-let-7c	5267.1	0.382517	-6.3705	-2.43683	1.88e-10	2.55e-09	DOWN
hsa-mir-1	28142.5	0.397703	-6.00341	-2.38757	1.93e-09	2.14e-08	DOWN
hsa-mir-10b	173097	0.359846	-9.55003	-3.43654	1.3e-21	5.27e-20	DOWN
hsa-mir-1269a	130.062	1.28618	3.14927	5.56778	0.00163681	0.00453842	UP
hsa-mir-141	1496.81	0.488444	6.10424	2.98173	1.03e-09	1.26e-08	UP
hsa-mir-142	2700.97	0.495266	5.59195	2.76954	2.25e-08	2.24e-07	UP
hsa-mir-143	93787.1	0.429506	-5.3807	-2.31104	7.42e-08	5.66e-07	DOWN
hsa-mir-144	514.985	0.611922	-8.3122	-5.09027	9.39e-17	2.29e-15	DOWN
hsa-mir-145	4390.2	0.391039	-7.50994	-2.9367	5.92e-14	1.03e-12	DOWN
hsa-mir-148a	58705.8	0.371329	5.38938	2.00123	7.07e-08	5.66e-07	UP
hsa-mir-17	1096.11	0.408183	4.99839	2.0403	5.78e-07	3.21e-06	UP
hsa-mir-183	10517.6	0.479851	5.44744	2.61395	5.11e-08	4.45e-07	UP
hsa-mir-187	16.6119	0.636357	2.36384	3.29081	0.0180866	0.0334328	UP
hsa-mir-196a-1	115.382	0.537664	3.72894	2.00549	0.00019229	0.000689984	UP
hsa-mir-200a	655.192	0.454868	5.11822	2.32828	3.08e-07	1.79e-06	UP
hsa-mir-200b	727.801	0.531626	4.00064	2.12694	6.32e-05	0.000265757	UP
hsa-mir-206	254.616	0.486575	-4.48947	-2.18459	7.14e-06	3.63e-05	DOWN
hsa-mir-210	432.2	0.54311	6.99764	3.80199	2.6e-12	3.97e-11	UP
hsa-mir-335	183.918	0.526782	-5.31767	-2.80179	1.05e-07	6.41e-07	DOWN
hsa-mir-379	1009.09	0.431477	-5.5814	-2.40829	2.39e-08	2.24e-07	DOWN
hsa-mir-451a	1963.2	0.608409	-8.22931	-5.00726	1.88e-16	3.83e-15	DOWN
hsa-mir-455	641.415	0.462473	8.41834	3.89449	3.82e-17	1.16e-15	UP
hsa-mir-486-1	751.694	0.629075	-10.1938	-6.42453	2.11e-24	2.58e-22	DOWN
hsa-mir-613	743.484	0.635032	-9.92858	-6.31552	3.13e-23	1.91e-21	DOWN
hsa-mir-9-1	2013.21	0.605718	5.36689	3.25083	8.01e-08	5.75e-07	UP
hsa-mir-9-2	2002.59	0.60677	5.34084	3.24067	9.25e-08	5.94e-07	UP
hsa-mir-9-3	2022.7	0.606004	5.34405	3.23852	9.09e-08	5.94e-07	UP
hsa-mir-99a	2119.07	0.507944	-3.97621	-2.0197	7e-05	0.000284763	DOWN
